# 1 **Structural titration reveals Ca<sup>2+</sup>-dependent conformational landscape of the IP<sub>3</sub> receptor**

2 Navid Paknejad\*<sup>1,2</sup>, Vinay Sapuru\*<sup>1,2</sup>, Richard K. Hite<sup>#1</sup>

3 <sup>1</sup> Structural Biology Program, Memorial Sloan Kettering Cancer Center, New York, NY, 10065

4 <sup>2</sup> Physiology, Biophysics, and Systems Biology (PBSB) Program, Weill Cornell Graduate  
5 School of Biomedical Sciences, 1300 York Avenue, New York, NY, 10065, USA

6

7 \* Equal contribution

8 # Correspondence to [hiter@mskcc.org](mailto:hiter@mskcc.org)

9

## 10 **Summary**

11 Inositol 1,4,5-trisphosphate receptors (IP<sub>3</sub>Rs) are intracellular Ca<sup>2+</sup>-permeable cation  
12 channels whose biphasic dependence on cytoplasmic Ca<sup>2+</sup> gives rise to cytosolic Ca<sup>2+</sup>  
13 oscillations that regulate fertilization, cell division and cell death. Despite the critical roles of  
14 IP<sub>3</sub>R-mediated Ca<sup>2+</sup> oscillations, the structural underpinnings of the biphasic Ca<sup>2+</sup> dependence  
15 that underlies Ca<sup>2+</sup> oscillations are incompletely understood. Here, we collected images of an  
16 IP<sub>3</sub>R with Ca<sup>2+</sup> at concentrations spanning five orders of magnitude. Unbiased image analysis  
17 revealed that Ca<sup>2+</sup> binding does not explicitly induce conformational changes but rather biases  
18 a complex conformational landscape consisting of resting, preactivated, activated, and  
19 inhibited states. Using particle counts as a proxy for free energy, we demonstrate that Ca<sup>2+</sup>  
20 binding at a high-affinity site allows IP<sub>3</sub>Rs to activate by escaping a low-energy resting state  
21 through an ensemble of preactivated states. At high Ca<sup>2+</sup>, IP<sub>3</sub>Rs preferentially enter an  
22 inhibited state stabilized by a second, low-affinity Ca<sup>2+</sup> binding site. Together, these studies  
23 provide a mechanistic basis for the biphasic Ca<sup>2+</sup>-dependence of IP<sub>3</sub>R channel activity.

24

## 25 **Introduction**

26 Inositol-1,4,5-trisphosphate receptors (IP<sub>3</sub>Rs) are large, tetrameric cation channels that  
27 serve as the primary intracellular calcium (Ca<sup>2+</sup>) release channels in non-excitabile cells.  
28 Expressed in the endoplasmic reticulum (ER), IP<sub>3</sub>Rs mediate the flow of Ca<sup>2+</sup> from the ER into  
29 the cytoplasm and other cellular compartments where Ca<sup>2+</sup> contributes to the regulation of cell  
30 division <sup>1</sup>, differentiation <sup>2</sup>, metabolism <sup>3</sup>, migration <sup>4,5</sup>, and death <sup>6</sup>. Consequently,  
31 dysregulation of IP<sub>3</sub>Rs is associated with numerous pathologies including cancer <sup>7-9</sup>,

32 neurological<sup>10,11</sup>, cardiac<sup>12</sup>, and immune<sup>13</sup> diseases. IP<sub>3</sub>R activation requires nanomolar  
33 cytosolic Ca<sup>2+</sup> and the second messenger IP<sub>3</sub>, whose production is stimulated by tyrosine  
34 kinase and G protein-coupled receptor signaling pathways<sup>14–20</sup>. Notably, IP<sub>3</sub>Rs are inhibited by  
35 micromolar cytosolic Ca<sup>2+</sup> concentrations, resulting in a biphasic Ca<sup>2+</sup> dependence. The  
36 recursive nature of IP<sub>3</sub>R regulation by its permeant ion results in the emergent phenomenon of  
37 Ca<sup>2+</sup> oscillations in cells. The Ca<sup>2+</sup> dependence of both activation and inhibition are further  
38 modified by the concentration of IP<sub>3</sub> as well as ATP, ER Ca<sup>2+</sup> and numerous protein interaction  
39 partners<sup>21–23</sup>. In this manner, IP<sub>3</sub>Rs integrate multiple upstream signals to tune the frequency  
40 and amplitude of Ca<sup>2+</sup> oscillations to encode regulatory information for diverse cellular  
41 processes such as mitochondrial oxidative metabolism<sup>24</sup>, gene expression<sup>25</sup>, lymphocyte  
42 activation<sup>26</sup> and neuronal development<sup>27</sup>.

43 Structural snapshots of IP<sub>3</sub>Rs in the presence and absence of regulatory ligands  
44 revealed the overall architecture of the channel and how ligands can stabilize conformational  
45 changes<sup>28–34</sup>. These studies revealed that IP<sub>3</sub>Rs possess a transmembrane domain that  
46 resembles other 6 transmembrane (6TM) ion channels such as voltage-gated ion channels  
47 and TRP channels and a large cytosolic domain (CD) that contains all of the known regulatory  
48 ligand-binding sites and shares some homology with the Ryanodine Receptor (RyR)<sup>35</sup>. When  
49 both Ca<sup>2+</sup> binding sites are occupied, the pore remains closed regardless of IP<sub>3</sub> binding status  
50<sup>29</sup>. In contrast, a recent structure suggests that the pore opens when only one of the Ca<sup>2+</sup>  
51 binding site is occupied in the presence of IP<sub>3</sub><sup>33</sup>. Structures of the ligand-free (closed) and  
52 Ca<sup>2+</sup>- and IP<sub>3</sub>-bound (open) states further establish a structural basis for the activation of  
53 IP<sub>3</sub>Rs. However, many additional conformations have been resolved whose functional  
54 corollaries remains unclear. More broadly, the conformational landscape that enables IP<sub>3</sub>Rs to  
55 pivot from activation to inhibition in order to generate Ca<sup>2+</sup> oscillations remains unknown. We  
56 therefore sought to establish high-resolution thermodynamic models of IP<sub>3</sub>R activation and  
57 inhibition using single-particle cryo-EM. By collecting images of human type 3 IP<sub>3</sub>R (hIP<sub>3</sub>R3)  
58 vitrified in a broad range of Ca<sup>2+</sup> concentrations and treating particle abundance as a proxy for  
59 the relative free energy of each state, we evaluate how Ca<sup>2+</sup> biases the conformational  
60 landscape of IP<sub>3</sub>Rs. These results establish the structural basis for IP<sub>3</sub>R-generated Ca<sup>2+</sup>  
61 oscillations.

62

### 63 **Structural Ca<sup>2+</sup> titration reveals conformational landscape of hIP<sub>3</sub>R3**

64 To elucidate the mechanisms by which IP<sub>3</sub> and Ca<sup>2+</sup> together activate the channel, and  
65 high Ca<sup>2+</sup> concentrations inhibit the channel, we collected transmission electron  
66 cryomicroscopic (cryo-EM) images of purified human Type 3 IP<sub>3</sub> receptors (hIP<sub>3</sub>R3) prepared  
67 with saturating (200 μM) IP<sub>3</sub>, saturating (1 mM) ATP, and five Ca<sup>2+</sup> concentrations spanning a  
68 physiological range from 1 nM to 10 μM (Figure 1A; Figure S1). Our cryo-EM conditions  
69 correspond to a range where hIP<sub>3</sub>R3 would be predicted to display a biphasic relationship  
70 between Ca<sup>2+</sup> concentration and channel open probability. To track the Ca<sup>2+</sup>-dependence of  
71 the IP<sub>3</sub>R conformational landscape in an unbiased manner, we merged these datasets and  
72 performed image processing in aggregate (Figure S2; Table S1).

73 Using hierarchical classification, we resolved five four-fold symmetric major states for  
74 hIP<sub>3</sub>R3 at resolutions up to 2.5 Å (Table S1 and S2). By relaxing the imposed C4 symmetry  
75 and computing latent representations of the conformational heterogeneity present in the  
76 remaining classes using 3D variability analysis (3DVA)<sup>36</sup>, we were also able to reconstruct  
77 discrete low-abundance intermediates, including several that are asymmetric or exhibited  
78 pseudosymmetry in specific regions of the channel. Due to overlapping ligand-binding profiles  
79 of the major states and the large number of minor states, we established a heuristic describing  
80 four features of the channel that facilitate comparisons between the states as well as with  
81 existing IP<sub>3</sub>R structures. The features that comprise the heuristic are the beta-trefoil (BTF) ring,  
82 armadillo repeat domain 2 (ARM2), the juxtamembrane domain (JD) ring and the pore (Figure  
83 1B-F). The most predominant of these features is the conformation of the cytosolic BTF ring,  
84 which adopts either an intact tetrameric ring structure that stabilizes the entire cytosolic domain  
85 (CD), or a disrupted state in which the CDs of the four protomers are decoupled and highly  
86 dynamic. Second is the conformation of the peripheral ARM2 domain, which can be either  
87 extended away from the rest of the CD or retracted. Third is the JD ring, which is located at the  
88 interface between the CD and the transmembrane domain (TMD) and can adopt either an  
89 intact ring structure or a disrupted, open conformation. Last is the pore, which can either be  
90 closed or open.

91 In the first of the major states, the BTF ring is intact, ARM2 is extended, the JD ring is  
92 intact and the pore is closed (Figure 1B; Figure S5; Movie M2; Tables S1 and S2). As this  
93 state resembles previously published ligand-free states of IP<sub>3</sub>Rs in various detergents (PDB:

94 3JAV, 6DQJ, 6MU2, 6UQK, 7LHF) and lipid environments (PDB: 7LHE)<sup>28–32</sup>, we assigned this  
95 conformation as a resting state. Two similar minor states were also present that share the  
96 overall conformation of the resting state but differ slightly in the conformation of the TMD with  
97 much weaker density for the peripheral S1-S4 domain (Figure S9; Movie M7; Table S3). Due  
98 to the increased conformational heterogeneity of the TMD in these states, we assigned them  
99 as labile resting 1 and labile resting 2.

100 The second and third major states also have intact BTF and JD rings and a closed pore,  
101 but their ARM2 domains adopt the retracted conformation, where it is rotated towards the  
102 central linker domains (CLD) (Figures 1C-D, S7, and S8; Movies M4 and M5; Tables S1 and  
103 S2). Differentiating these two states is the presence of a non-protein density occupying the  
104 previously identified JD Ca<sup>2+</sup> binding site that we assigned as a bound Ca<sup>2+</sup> ion. A fourth state  
105 shares the intact BTF ring and retracted ARM2 domain with the second and third states, but its  
106 pore is open and its JD ring is disrupted (Figure 1E; Figure S6; Movie M3; Tables S1 and S2).  
107 Based on the open conformation of the pore, we assigned the fourth state as an activated  
108 state. This activated state is largely indistinguishable from a recently published structure of  
109 hIP<sub>3</sub>R3 with its pore in an open configuration<sup>33</sup>. As the second and third states differ from the  
110 activated state only in their closed pores and intact JD rings, we assigned them as a  
111 preactivated state and a preactivated+Ca<sup>2+</sup> state, respectively.

112 In addition to the four-fold symmetric resting and preactivated states, we also resolved  
113 classes with asymmetric CDs. In these classes, either one, two or three of the ARM2 domains  
114 adopt the retracted conformation. Together, these three classes represent a continuum of  
115 states between the resting state, where all four ARM2 domains are extended, and the  
116 preactivated state, where all four ARM2 domains are retracted, a finding we previously  
117 reported for channels in the presence of IP<sub>3</sub><sup>29</sup> (PDB: 6DQS, 6DQZ, 6DR0). While we were  
118 able to resolve structures for these states, we observed significant continuous heterogeneity  
119 among these asymmetric classes. Therefore, we combined these particles into an ensemble  
120 that we call the resting-to-preactivated transitions for quantification (Movie M6). We also  
121 observed classes with asymmetric features in the JD and TMD that otherwise resembled the  
122 resting or preactivated states. The pore in these classes has undergone movements that result  
123 in either two-fold pseudosymmetric (~C2) or four-fold pseudosymmetric (~C4) dilations  
124 compared to the resting state (Figure S15). We will refer to the classes with extended ARM2

125 domains as resting TMD transitions and those with retracted ARM2 domains as preactivated  
126 TMD transitions.

127 In the fifth major state, the BTF ring is disrupted, ARM2 is retracted, the JD ring is intact  
128 and the pore is closed (Figure 1E; Tables S1 and S2). A second minor population of particles  
129 sharing these features was also identified in which the channels were organized into higher-  
130 order assemblies containing two or more tetrameric channels. Notably, the interactions that  
131 mediate the assemblies are the only distinguishing feature between these two states.  
132 Otherwise, the channels adopt largely similar conformations. These two BTF ring disrupted  
133 states are reminiscent of previously published  $\text{Ca}^{2+}$ -bound hIP<sub>3</sub>R3 structures (PDB: 6DRC,  
134 6DR2, 6DRA, 7T3U)<sup>29,33</sup>, where BTF ring disruption confines IP<sub>3</sub>-induced conformational  
135 changes to the CD, so we assigned the major state as an isolated inhibited state and the minor  
136 state as an assembled inhibited state (Figure 1F; Movie M1).

137

### 138 **Ligand dependence of hIP<sub>3</sub>R3 conformations**

139 To evaluate the relationship between ligand occupancy and conformational state, we  
140 inspected the cryo-EM maps and identified densities in the resting, preactivated,  
141 preactivated+ $\text{Ca}^{2+}$ , activated and inhibited states consistent with an IP<sub>3</sub> bound at the BTF2-  
142 ARM1 interface and with a  $\text{Zn}^{2+}$  and an ATP bound in the JD of all five major states (insets in  
143 Figure 1B-F). Density for IP<sub>3</sub> is also present in the asymmetric subclasses that belong to the  
144 resting-to-preactivated transitions, indicating that the 200  $\mu\text{M}$  IP<sub>3</sub> concentration used for  
145 vitrification was sufficient to saturate the binding site<sup>37</sup>, and that asymmetry of the ARM2  
146 conformations did not arise from substoichiometric IP<sub>3</sub> binding. The IP<sub>3</sub>-binding site is best  
147 resolved in the resting state where Arg568 on ARM1 coordinates the 1-phosphate of IP<sub>3</sub>  
148 conferring a specific orientation to IP<sub>3</sub> in this pocket as predicted by mutagenesis<sup>38</sup>. Arg266  
149 and Arg270 on BTF2, and Arg503, Lys507, Arg510, and Lys569 on ARM1 complete the  
150 positively charged binding site to coordinate IP<sub>3</sub> (PDB: 1N4K, 3T8S, 3UJ0)<sup>39-41</sup>. As observed  
151 previously<sup>29</sup>, IP<sub>3</sub> can bind the channel via two modes (Figure S10). Comparing the resting  
152 state to a previously published ligand-free state (PDB: 6DQJ), IP<sub>3</sub> binding results in a  
153 contraction of the IP<sub>3</sub>-binding pocket through movement of a loop (Leu265-Ser278) on BTF2  
154 (Figure S10A). Conversely, in the ARM2 retracted states, ARM1 tilts towards IP<sub>3</sub> and the loop

155 on BTF2 to contract the ARM1-BTF2 interface (Figure S10B-E). IP<sub>3</sub> is coordinated by the same  
156 residues in both binding modes (insets in Figure 1B-F).

157 The Zn<sup>2+</sup> ion bound in the JD is coordinated by a C<sub>2</sub>H<sub>2</sub> zinc-finger fold formed by  
158 Cys2538, Cys2541, His2558, and His2563, where it has been observed in other IP<sub>3</sub>R  
159 structures<sup>28</sup> (insets in Figure 1B-F). The adenine base of the nearby ATP is buried in a  
160 hydrophobic cavity that was recently identified as an ATP-binding site that is structurally  
161 conserved with RyRs (Figure S11A-C; PDB: 7T3P, 5TAP)<sup>33,42</sup>. Specificity for adenine bases  
162<sup>21,43-45</sup> is imparted through the primary amine of the base forming interactions with the  
163 backbone carbonyl oxygen of His2558 and thiolate of Cys2538. The triphosphate moiety of  
164 ATP extends away from the JD with clear densities corresponding to the α and β phosphates,  
165 which are directly coordinated by Lys2152 and Lys2560, respectively. The γ-phosphate is  
166 poorly resolved and does not form direct interactions with the channel. Taken together, the  
167 coordination of ATP is consistent with both ATP and ADP having greater potentiating effects  
168 on IP<sub>3</sub>R<sub>s</sub> over AMP<sup>21,43,44</sup>.

169 In contrast to the saturating conditions for IP<sub>3</sub> and ATP, our buffers sampled a range of  
170 Ca<sup>2+</sup> concentrations that span the reported apparent affinities for both activation and inhibition  
171 of IP<sub>3</sub>R<sub>s</sub>, suggesting that we might resolve a range of Ca<sup>2+</sup> occupancies among the major  
172 states. To assess the Ca<sup>2+</sup>-dependence of each conformation, we first inspected the cryo-EM  
173 density maps near the previously identified JD and CD Ca<sup>2+</sup> binding sites<sup>29</sup>. In both the resting  
174 state and the preactivated state, no density peaks consistent with a bound Ca<sup>2+</sup> ion were  
175 observed at either binding site (Figure 1B-F). In the preactivated+Ca<sup>2+</sup> state, we observed a  
176 density peak that we assigned as a Ca<sup>2+</sup> in the JD site while the CD site was unoccupied. The  
177 Ca<sup>2+</sup>-binding profile of the activated state is the same as the preactivated+Ca<sup>2+</sup> state, with an  
178 occupied JD site and an empty CD site. Only in the inhibited state did we observe densities  
179 corresponding to Ca<sup>2+</sup> in both sites. In the three JD Ca<sup>2+</sup>-bound states, the backbone of  
180 Thr2581 from the JD and side chains of Glu1882, Glu1946, Gln1949 from ARM3 coordinate  
181 the Ca<sup>2+</sup> (Figure 3Q). The CD Ca<sup>2+</sup>, observed exclusively in the inhibited state, is coordinated  
182 by the backbone of Arg743 from the CLD and side chain of Glu1125 and backbone of Glu1122  
183 from ARM2. Outside of the CD and JD sites, no densities consistent with bound Ca<sup>2+</sup> ions  
184 could be identified in any of the maps. Taken together with our previous analyses of hIP<sub>3</sub>R3 in  
185 saturating Ca<sup>2+</sup><sup>29</sup>, these data are consistent with the JD and CD sites being the primary Ca<sup>2+</sup>

186 binding sites in IP<sub>3</sub>Rs. Thus, in addition to their distinct global conformations, the five major  
187 states display defining ligand-binding properties. The resting and preactivated states, which  
188 bind IP<sub>3</sub>, ATP, and Zn<sup>2+</sup>, but not Ca<sup>2+</sup>, differ in how they coordinate IP<sub>3</sub>. In addition to IP<sub>3</sub>, ATP,  
189 and Zn<sup>2+</sup>, a single Ca<sup>2+</sup> ion is bound to each protomer of the preactivated+Ca<sup>2+</sup> and activated  
190 states, while two Ca<sup>2+</sup> ions are bound to each promoter of the inhibited state.

191

### 192 **Ca<sup>2+</sup> perturbs the energetic landscape of hIP<sub>3</sub>R3**

193 Single-particle cryo-EM analysis of vitrified samples represents a near equilibrium  
194 assessment of their conformational landscape, allowing one to infer relative conformational  
195 free energy from the number of particles that populate specific structural classes<sup>46</sup>. Therefore,  
196 by analyzing the effects of Ca<sup>2+</sup> on the relative abundance of each hIP<sub>3</sub>R3 conformation or  
197 ensemble, we can assess how Ca<sup>2+</sup> biases the energetic landscape of the channel to favor  
198 activation at intermediate concentrations and favor inhibition at high concentrations.  
199 Furthermore, the Ca<sup>2+</sup>-dependent conformational landscape can provide additional confidence  
200 in the assignment of functional correlates to the observed conformational states (Figure 2). For  
201 example, the abundance of the putative resting state, which closely resembles the ligand-free  
202 state and shows no evidence of bound Ca<sup>2+</sup> ions, is negatively correlated with the  
203 concentration of Ca<sup>2+</sup>. At low Ca<sup>2+</sup>, 45.2% of the particles adopt the resting state whereas this  
204 percentage drops to 0.7% at high Ca<sup>2+</sup>. Together, the two labile resting states follow a similar  
205 pattern, starting at 20.4% of the particles at 1 nM and falling to 1.2% at 10 μM. The ensemble  
206 of resting TMD transitions, comprised of the ~C2 and ~C4 states, is also similar, starting at 6%  
207 at 1 nM and falling to 2.4% at 10 μM.

208 We observed two distinct inhibited states – an isolated inhibited state and an assembled  
209 inhibited state in which several inhibited tetramers form higher-order assemblies (Figures 1E,  
210 S4 and S2). Although the states are structurally very similar with disrupted BTF rings and both  
211 Ca<sup>2+</sup>-binding sites being occupied, they have distinct abundance profiles with respect to Ca<sup>2+</sup>  
212 concentration (Figure 2A). The abundance of the isolated inhibited channels is the inverse of  
213 the resting state i.e. positively correlated to Ca<sup>2+</sup> concentration, increasing monotonically to a  
214 maximum of 74.5% at 10 μM. The assembled inhibited state channels follows the same pattern  
215 at low Ca<sup>2+</sup> concentrations, increasing from 5.9% at 1 nM to a maximum of 20.1% at 100 nM.  
216 However, higher Ca<sup>2+</sup> concentrations do not have any additional effect as the abundance of

217 the assembled inhibited state plateaus between 17.6% and 20.1%. Although the structures of  
218 the tetramers in the higher-order assemblies are indistinguishable from the individual inhibited  
219 tetramers, their divergent  $\text{Ca}^{2+}$ -dependence suggests that they are distinct states and that  
220 formation of higher-order assemblies may represent an alternative mechanism for achieving an  
221 inhibited state, as we will discuss later.

222 In contrast to the resting-like states and the inhibited states, the distribution of the  
223 preactivated-like and activated states exhibit biphasic  $\text{Ca}^{2+}$  dependencies, achieving their  
224 maximum abundance at intermediate  $\text{Ca}^{2+}$  concentrations (Figure 2A). Starting with the  
225 ensemble of resting-to-preactivated transitions, which achieve a maximum of 10.5% at 10 nM,  
226 the profiles of the preactivated, preactivated+ $\text{Ca}^{2+}$ , the ensemble of ~C2 and ~C4 preactivated  
227 TMD transitions, and the activated state are shifted rightward to progressively higher  $\text{Ca}^{2+}$   
228 concentrations. Apart from the activated state, the maximum abundance achieved by these  
229 states also decreases in a progressive manner, consistent with these states being  
230 progressively higher energy intermediates along a reaction coordinate extending from the  
231 resting state to the activated state. This continuum of inter-convertible states also provides a  
232 rationale for why the ensemble of resting-to-preactivated transitions and the preactivated state  
233 display a clear correlation with  $\text{Ca}^{2+}$  despite not showing evidence of binding  $\text{Ca}^{2+}$  themselves.

234 The abundance profile of the activated state agrees with decades of single-channel  
235 electrophysiological analyses of  $\text{IP}_3\text{Rs}$ , showing a biphasic open probability in the presence of  
236 saturating  $\text{IP}_3$  and ATP with maximal activity occurring in the high nM  $\text{Ca}^{2+}$  range (Figure 2A)  
237 <sup>19</sup>. Moreover, the  $\text{Ca}^{2+}$ -dependent conformational landscape of  $\text{IP}_3\text{Rs}$  resolves a bipartite  
238 mechanism for this biphasic relationship with  $\text{Ca}^{2+}$  concentration. At low  $\text{Ca}^{2+}$   $\text{IP}_3\text{Rs}$  must  
239 escape a low-energy ARM2 extended resting state in order to activate by binding  $\text{Ca}^{2+}$  at the  
240 high-affinity JD site. At high  $\text{Ca}^{2+}$ ,  $\text{IP}_3\text{Rs}$  preferentially enter a low-energy inhibited state  
241 stabilized by a second  $\text{Ca}^{2+}$  ion binding to the low-affinity CD site.

242

### 243 **The JD $\text{Ca}^{2+}$ site is essential for $\text{Ca}^{2+}$ oscillations**

244 The multimodal regulation of  $\text{IP}_3\text{Rs}$ , including activation and feedback inhibition by  $\text{Ca}^{2+}$ ,  
245 produces  $\text{IP}_3\text{R}$ -dependent  $\text{Ca}^{2+}$  oscillations in cells <sup>47-50</sup>. Structurally, we observe that  $\text{Ca}^{2+}$   
246 binding at the JD can occur in the putative activated state, while  $\text{Ca}^{2+}$  binding at the CD site  
247 occurs only in the inhibited states. To assess the roles of these sites in cellular  $\text{Ca}^{2+}$



248 oscillations and to attempt to establish a functional corollary to the conformational states  
249 obtained through the structural  $\text{Ca}^{2+}$  titration, we employed a fluorescence-based  $\text{Ca}^{2+}$  imaging  
250 assay that monitors  $\text{Ca}^{2+}$  oscillations in cells. We first incubated HEK293T cells lacking all  
251 three  $\text{IP}_3\text{R}$  isoforms ( $\text{IP}_3\text{R}$ -null) with Cal-520-AM, a fluorogenic calcium-sensitive dye, and then  
252 stimulated intracellular  $\text{IP}_3$  generation by adding carbachol to the bath solution<sup>51</sup> (Figure 3B).  
253 Saturating carbachol concentrations (100  $\mu\text{M}$ ) were added to cells to minimize potential  
254 stimulus dependent effects on the  $\text{IP}_3\text{R}$  response in cells<sup>52</sup>. Consistent with earlier reports<sup>51</sup>,  
255 no detectable changes in cytosolic  $\text{Ca}^{2+}$  were observed in  $\text{IP}_3\text{R}$ -null cells (Figure S12P).  
256 Conversely,  $\text{Ca}^{2+}$  oscillations of two or more peaks were observed in cells transiently  
257 expressing h $\text{IP}_3\text{R}3$ , indicating that the construct used for structural analysis expresses a  
258 functional channel (Figure 3C-E). We assessed the temporal characteristics of the carbachol  
259 stimulated  $\text{Ca}^{2+}$  spikes in cells by aligning the initial peak of each normalized cellular trace that  
260 produced an oscillatory response (Figure 3D). For  $\text{IP}_3\text{R}$ -null transiently expressing wild-type  
261 h $\text{IP}_3\text{R}3$ , the mean slope of the rising phase at the half-maximal intensity was 0.15  
262  $\text{Fluorescence}_{\text{norm}} \text{sec}^{-1}$ . Traces were also analyzed to determine the number of peaks  
263 observed in cells showing oscillatory responses following carbachol stimulation, with cells  
264 expressing wild-type h $\text{IP}_3\text{R}3$  having a median of 4 peaks/cell (Figure 3E). Finally, to calculate  
265 the time between successive  $\text{Ca}^{2+}$  spikes (inter-spike interval), we extracted traces from  
266 segmented cells, smoothed and adjusted the baseline to automatically identify peaks. For wild-  
267 type h $\text{IP}_3\text{R}3$  the mean inter-spike interval was 21.7 seconds, which is within the range of times  
268 measured for endogenous  $\text{IP}_3\text{R}$ -mediated cytosolic  $\text{Ca}^{2+}$  oscillations<sup>53,54</sup>.

269 Having established metrics that describe the carbachol-induced  $\text{Ca}^{2+}$  oscillations of  
270 wild-type h $\text{IP}_3\text{R}3$ , we next examined the effects of perturbing the  $\text{Ca}^{2+}$ -binding sites. We  
271 transiently expressed h $\text{IP}_3\text{R}3$  with mutations to the JD site (Glu1882Gln+Glu1946Gln), the CD  
272 site (Glu1125Gln) or both sites (Glu1125Gln+Glu1882Gln+Glu1946Gln) in  $\text{IP}_3\text{R}$ -null cells.  
273 Robust  $\text{Ca}^{2+}$  oscillations were observed in cells expressing the CD mutant (Figure 3F-H). While  
274 the mean rising phase was similar to wild-type h $\text{IP}_3\text{R}3$  (Figure 3G), the mean inter-spike  
275 interval was approximately half at 12.7 seconds (Figure S12F), suggesting that perturbing the  
276 CD site alters gating of h $\text{IP}_3\text{R}3$ . As the CD site is exclusively occupied in the inhibited states,  
277 our structural and functional analyses are consistent with  $\text{Ca}^{2+}$  binding at the CD site  
278 contributing to channel inhibition.

279 Unlike cells expressing wild-type channels or the CD mutant, we did not observe  
280 oscillatory responses in cells expressing either the JD mutant (Figure 3I-K) or the JD/CD  
281 double mutant (Figure S12S). Instead, we observed a single slow non-oscillatory event in both  
282 mutants that did not resemble the events seen in cells expressing the wild-type channel. The  
283 mean slope of the rising phase was 3.7 times slower for cells expressing the JD mutant (Figure  
284 3J) and 3.0 times slower for cells expressing the JD/CD double mutant (Figure S12S) than  
285 those of cells expressing wild-type hIP<sub>3</sub>R3 (Figure S12T). Therefore, although perturbations to  
286 the JD site do not abolish IP<sub>3</sub>R-mediated Ca<sup>2+</sup> release, consistent with recent  
287 electrophysiological analyses showing diminished activity of JD site mutants<sup>55</sup>, the JD site is  
288 essential for ensuring the fidelity of agonist-evoked cytosolic Ca<sup>2+</sup> oscillations in cells.

289

### 290 **Binding of the JD Ca<sup>2+</sup> ion has distinct effects on channel conformation**

291 Although Ca<sup>2+</sup> binding to the JD site is required for Ca<sup>2+</sup> oscillations in cells through  
292 stabilizing the activated state, it is also occupied in the preactivated+Ca<sup>2+</sup> and inhibited states,  
293 both of which are closed. To gain insights into how Ca<sup>2+</sup> binding stabilizes these three distinct  
294 conformations, we aligned the JD of the five major states (Figure 3L-O) to visualize the  
295 progressive changes to the JD Ca<sup>2+</sup> binding site during activation and inhibition. The pair-wise  
296 comparisons reveal that large changes to the ARM3-JD interface occur exclusively during the  
297 transition from the preactivated+Ca<sup>2+</sup> to the activated state: the JD-distal region of ARM3  
298 rotates 6 Å towards the JD while the JD-proximal region shifts upwards 2 Å back to its resting  
299 state position (Figure 3N). The changes that occur during the other transitions are more subtle.  
300 For example, the transitions from resting to preactivated and from preactivated to  
301 preactivated+Ca<sup>2+</sup> are each accompanied by 1 Å downward movements of the JD-proximal  
302 part of ARM3 (Figure 3L-M). Binding a second Ca<sup>2+</sup> at the CD site also results in a minimal  
303 rearrangement of the ARM3-JD interface, with both the distal and proximal regions of ARM3  
304 moving down 1 Å during the transition from the activated to inhibited state (Figure 3O).  
305 Surprisingly, despite the large conformational differences between the preactivated+Ca<sup>2+</sup>,  
306 activated and inhibited states, the configuration of the residues that form the JD site are nearly  
307 identical. The JD binding site appears to adopt only two conformations, a Ca<sup>2+</sup>-free expanded  
308 conformation in the resting and preactivated states and a Ca<sup>2+</sup>-bound contracted conformation  
309 in the preactivated+Ca<sup>2+</sup>, activated and inhibited states (Figure 3P-Q). Furthermore, we only

310 observe stable occupancy of the JD site in the ARM2 retracted states, suggesting that the IP<sub>3</sub>-  
311 stabilized movement of ARM2 increases the affinity for Ca<sup>2+</sup>. Allosteric coupling between Ca<sup>2+</sup>  
312 and IP<sub>3</sub> binding is consistent with biochemical experiments suggesting that Ca<sup>2+</sup> binding can  
313 increase the affinity for IP<sub>3</sub> <sup>56,57</sup>, and kinetic experiments showing IP<sub>3</sub> binding exposes a high-  
314 affinity Ca<sup>2+</sup> binding site <sup>58</sup>. In summary, although Ca<sup>2+</sup> binding to the JD site results in a single,  
315 distinct conformation of the binding site, the effect of Ca<sup>2+</sup> binding on channel conformation at  
316 the global level can be varied and is influenced by the global ligand-binding status of the  
317 channel.

318

### 319 **IP<sub>3</sub> primes channel activation through a cooperative process involving ARM2 retraction**

320 Activation of IP<sub>3</sub>Rs requires that all four IP<sub>3</sub> binding sites be intact <sup>51</sup>, suggesting that a  
321 coordinated IP<sub>3</sub>-mediated conformational change must occur prior to pore opening. Our  
322 previous analysis revealed that the transition between ARM2 extended and ARM2 retracted  
323 states is both IP<sub>3</sub>-mediated, with the retracted state only being resolved in the presence of IP<sub>3</sub>,  
324 and cooperative, with the four-fold symmetric extended or retracted conformations being  
325 substantially favored over the asymmetric states as opposed to a binomial distribution <sup>29</sup>. We  
326 therefore hypothesized that the IP<sub>3</sub> binding mode of a protomer can be sensed by its neighbors  
327 and that this communication may underlie the requirement for four intact IP<sub>3</sub> binding sites. To  
328 evaluate the relationships between a single protomer and its neighbors, we performed  
329 symmetry expansion, focused refinement, and 3DVA on the CD of a single protomer, which  
330 includes the uniformly-occupied IP<sub>3</sub> binding site and ARM2, for the resting-to-preactivated  
331 ensemble (Figure 4A). By calculating reconstructions for particles segmented along the  
332 primary dimension of variability, we can visualize the progression of one protomer (labeled *b* in  
333 Figure 4B-G) from the ARM2 extended conformation resolved in the resting state to the ARM2  
334 retracted conformation of the preactivated state. In the most extended ARM2 position of the  
335 central protomer, ARM2<sup>b</sup> forms two interactions with the counterclockwise protomer (labeled  
336 *a*), one with ARM1<sup>a</sup>, and a second with BTF1<sup>a</sup> (circled 1 and 2 in Figure 4B). The transition of  
337 protomer *a* to the ARM2 retracted state is accompanied by a contraction of the ARM1-BTF2  
338 interface around IP<sub>3</sub>. A consequence of this contraction is that ARM1<sup>a</sup> is pulled away from  
339 ARM2<sup>b</sup>, disrupting one of ARM2<sup>b</sup>'s interprotomer interactions (Figure 4C). The diminished  
340 association with the neighboring protomer results in a more dynamic state for ARM2<sup>b</sup>, which

341 manifests in weaker averaged density at its distal end (Figure 4D). The increased flexibility of  
342 ARM2<sup>b</sup> destabilizes its remaining interprotomer interaction with BTF1<sup>a</sup> and allows it to  
343 transiently disengage from BTF1<sup>a</sup> and rotate towards CLD<sup>b</sup> to adopt the retracted  
344 conformation. In the retracted conformation, ARM2<sup>b</sup> establishes a new interprotomer interface  
345 with BTF1<sup>a</sup> (labeled 3 in Figure 4E). ARM2<sup>b</sup> retraction results in a tilt of ARM1<sup>b</sup> away from  
346 ARM2 on the clockwise protomer and the entire progression repeats, enabling a cascade  
347 around the tetramer that primes the JD site for Ca<sup>2+</sup> binding (Figure 4F-G).

348         The observed continuum from a symmetric ARM2 extended resting state to a symmetric  
349 ARM2 retracted preactivated state suggests that this process is reversible despite the  
350 presence of saturating IP<sub>3</sub>. Consistent with the process being reversible, more particles adopt  
351 the resting state than do the ARM2 retracted preactivated and preactivated+Ca<sup>2+</sup> states  
352 (Figure 2). Potentially contributing to the favorability of the ARM2 extended state is a loop  
353 between Pro897 and Glu958 of the CLD, which we call the wedge loop. In the resting state, a  
354 portion of the wedge loop, including Thr926-Ala943, inserts into a cavity surrounded by the  
355 CLD, ARM1, ARM2 and ARM3 and adopts an ordered conformation (Figure 4H-I). Compared  
356 to the resting state, ARM2 retraction in the preactivated, preactivated+Ca<sup>2+</sup>, activated and  
357 inhibited states is accompanied by a contraction of this cavity. Modelling the resting state  
358 conformation of Thr926-Ala943 into the ARM2 retracted states, where we observed no density  
359 for the wedge loop, reveals several steric clashes that would likely disfavor binding of the  
360 wedge loop (Figure S13D-H). To further assess the relationship between ARM2 retraction and  
361 wedge loop binding, we recalculated the ARM2 extended portion of the 3DVA trajectory of the  
362 resting-to-preactivated transitions with finer sampling. By aligning the maps based on the  
363 strength of the density for the wedge loop, we found that the flexibility of ARM2, as assessed  
364 by the local quality of the density, is inversely correlated with the strength of the wedge loop  
365 density, indicating that the presence of the wedge loop stabilizes ARM2 in the extended  
366 conformation (Figure S13J-O). Moreover, this alignment reveals how the wedge loop  
367 dissociates from its binding site in a stepwise fashion. First to dissociate are the residues  
368 surrounding Arg931, which forms a salt-bridge with Glu966 and a hydrogen bond with the  
369 hydroxyl of Tyr1067 (Figure S13C,J-L). The N- and C-terminal ends of the wedge loop become  
370 disordered in the next snapshot (Figure S13M). Phe936, which packs against Gly1073 on a

371 helix from the CLD, is the last residue to become disordered, indicating that Phe936 is critical  
372 for the interaction (Figure S13B,N-O).

373 Flanking Phe936 is the conserved residue Ser934, which can be phosphorylated by  
374 protein kinase A (Figure 4I) <sup>59-61</sup>. Mutation of the residue equivalent to Ser934 in hIP<sub>3</sub>R2 to  
375 alanine abrogates the ability of protein kinase A to sensitize hIP<sub>3</sub>R2 to low-level stimulation by  
376 carbachol <sup>62</sup>. Modeling in a phosphorylated serine at position 934 places the phosphate group  
377 in close proximity to Ser937, potentially destabilizing the conformation of the wedge loop and  
378 weakening the critical interactions formed by Phe936, suggesting that phosphorylation of  
379 Ser934 may influence channel activity by destabilizing the resting state. Notably, the residues  
380 on and around the wedge loop described here are conserved among the three human IP<sub>3</sub>R  
381 isoforms, suggesting that the wedge loop may serve as regulatory motif that can influence the  
382 equilibrium between ARM2 extension and retraction and thus alters the affinity of the JD site  
383 for Ca<sup>2+</sup> in all IP<sub>3</sub>Rs (Figures S13I and S4H).

384 To explore the role of the ARM2-mediated conformational changes in channel  
385 activation, we deleted the ARM2 domain (dARM2 mutant; Ala1101-Trp1586) and assessed the  
386 effects of its loss on Ca<sup>2+</sup> oscillations (Figure 4J-L). Compared to cells expressing wild-type  
387 hIP<sub>3</sub>R3, carbachol stimulated Ca<sup>2+</sup> oscillations were observed less frequently ( $n_{WT} = 74$ ;  $n_{dARM2}$   
388 = 14) in cells expressing the dARM2 mutant despite both being expressed in a similar fraction  
389 of cells (Figure 4L). Also diminished was the frequency of the Ca<sup>2+</sup> spikes. The inter-spike  
390 interval was on average 4.7 times longer in cells expressing the dARM2 mutant than in cells  
391 expressing hIP<sub>3</sub>R3. Although the Ca<sup>2+</sup> spikes were infrequent, the mean slope of the rising  
392 phase of the few responding cells was similar to that of cells expressing wild-type hIP<sub>3</sub>R3,  
393 suggesting that the dARM2 mutant is functional. Thus, while ARM2 is not required for  
394 activation or inhibition, its loss appears to reduce the likelihood of exceeding the threshold  
395 required for Ca<sup>2+</sup> wave propagation <sup>49,63</sup>.

396

### 397 **Activation of hIP<sub>3</sub>R3 by IP<sub>3</sub>, Ca<sup>2+</sup> and ATP**

398 Compared to the preactivated+Ca<sup>2+</sup> state, conformational changes can be observed  
399 extending from ARM3 through the JD to the TMD in the activated state (Figure 3). In both  
400 states, the JD is composed of two discontinuous segments of the polypeptide that are  
401 interwoven to connect to both the N- and C-terminal ends of the TMD (Figure 5H-I). In the

402 preactivated+Ca<sup>2+</sup> state, the four JDs assemble into a tetrameric ring structure that is also  
403 observed in the other closed states. In the activated state, the contraction of the ARM3-JD  
404 interface induces a ~13° clockwise rigid body rotation of the JDs that disrupts the inter-JD  
405 interactions (Figure 5G) in a manner analogous to the disruption of the O-ring during RyR  
406 activation<sup>64</sup>. Through its direct links to S1 and S6 (Figure 5F), the rotation of the JD alters the  
407 conformation of the central pore domain and the peripheral S1-S4 domains. The second  
408 segment of the JD, which we call JD-B comprising Cys2538-Val2611 including the Ca<sup>2+</sup>-  
409 binding Thr2581, is directly linked to the cytosolic end of the pore-lining S6 helix. In the  
410 activated state, rotation of the JD pulls S6 away from the center of the pore, stabilizing a 13°  
411 bend of the cytosolic end of S6 along with a ~30° rotation about the helical axis of S6 with  
412 Gly2514 being the pivot for both. Together, the tilt and rotation of S6 reposition Phe2513 and  
413 Ile2517, which seal the ion conduction pathway in the closed states, out of the ion conduction  
414 pathway to create an open pore with a minimum radius of 4 Å (Figure 5A-E; Figure S14A-B;  
415 Movie M9-10). The repositioning of the gating residues is facilitated by rotameric switches in a  
416 manner akin to gating in Bestrophin chloride channels (Figure 5A-E)<sup>65</sup>. In addition to changing  
417 the dimensions of the pore, the tilt and rotation of S6 also alter the electrostatic profile of the  
418 pore (Figure S14C-D). In the closed states, Arg2524 is oriented towards the center of the pore,  
419 creating an electropositive environment that would pose resistance to cation permeation. In the  
420 activated state, Arg2524 is rotated out of the ion conduction pathway and its place is taken by  
421 both Asp2518 and Asp2522, which render the pore electronegative and may facilitate the high  
422 cation conductance of IP<sub>3</sub>Rs.

423 Through its connection to S1, the first segment of the JD, which we call JD-A, can bias  
424 the conformation of the S1-S4 domain. In the closed states the peripheral S1-S4 domains  
425 adopt upright conformations that stabilize the S4-S5 linkers, which connect the S1-S4 and pore  
426 domains in domain-swapped 6TM cation channels<sup>66</sup>, in a belt-like configuration that holds the  
427 pore-lining S6 helices closed (Figure 5A,F; Movie M11). In the activated state, the rotation of  
428 the JD tilts the S1-S4 domain towards the luminal side of the membrane and away from the  
429 pore (Figure 5F). This movement of the S1-S4 domains pulls the S4-S5 linkers away from the  
430 pore, thereby relaxing the belt around S6. Notably, while the S1-S4 domains remain in the  
431 upright conformation in the preactivated+Ca<sup>2+</sup> state, the diminished local resolution of the S1-

432 S4 domain suggests that  $\text{Ca}^{2+}$  binding increases the flexibility of this domain (Figure S6, S7,  
433 S8).

434 In addition to the fully-open activated state, our analysis identified two ensembles that  
435 contain subclasses with distorted pores that may represent snapshots of the rearrangements  
436 that occur during pore opening (Figure 6D-E). While the local resolutions of these  
437 reconstructions near the pore preclude atomic model building, comparing sections of the  
438 density maps can inform about how the pore and JDs move during gating. Among the  
439 ensemble of preactivated TMD transitions, there are two subclasses in which the conformation  
440 of the pore is altered by movements of either two pore-lining S6 helices in a  $\sim\text{C2}$  manner or all  
441 four of the S6 helices in a  $\sim\text{C4}$  manner. In the  $\sim\text{C2}$  subclass, the pore-lining S6 helices from  
442 two opposing protomers shift outwards compared to their positions in the resting and  
443 preactivated states, with the remaining two helices unchanged and thus maintaining a closed  
444 pore (Figure 6D). The conformations of the S4-S5 linkers also diverge between protomers. The  
445 S4-S5 linkers of the protomers with displaced S6 helices are shifted outwards compared to the  
446 preactivated+ $\text{Ca}^{2+}$  state and are no longer in close association with the S6 helix of the  
447 neighboring protomer. This uncoupled S4-S5 linker conformation appears to be stabilized by  
448 an interaction with S1' of the adjacent protomer (inset in Figure 6D). S1' and S1'' are two  
449 transmembrane helices unique to  $\text{IP}_3\text{Rs}$  that are inserted between S1 and S2 of the S1-S4  
450 domain<sup>29</sup>. In all other major states, S1' is poorly ordered and only interacts with the adjacent  
451 S1'' (insets in Figure 6). In the  $\sim\text{C2}$  transition, S1'' tilts towards the pore allowing S1' to insert  
452 underneath the S4-S5 linker of the adjacent protomer, potentially stabilizing this intermediate  
453 state. However, the precise role of S1' and S1'' in channel gating are unclear as we observed  
454 oscillatory  $\text{Ca}^{2+}$  responses in cells transduced with h $\text{IP}_3\text{R3}$  in which S1' and S1'' (Glu2227-  
455 Leu2276) are deleted (Figure 6G-I). Intriguingly, while the analogous linkage between S1 and  
456 S2 is a poorly ordered acidic loop in the distantly-related RyRs<sup>67</sup>, two helices preceding the  
457 S1-S4 domain occupy a similar position to S1'-S1'' in  $\text{IP}_3\text{Rs}$ <sup>42</sup>. In the  $\sim\text{C4}$  subclass, the S4-S5  
458 linkers and the S6 helices of all four protomers are outwardly displaced, creating a partially  
459 dilated pore (Figure 6E). However, compared to the activated state (Figure 6F), the dilation  
460 appears to be incomplete as the cytosolic ends of S6 remain closer together. Comparing the  
461 JD in the preactivated+ $\text{Ca}^{2+}$  and activated states reveals that the JD also adopts an

462 intermediate conformation. Whereas the JDs are both separated and rotated in the activated  
463 state, the JDs in the ~C4 transition are only separated.

464 Interpolating the ~C2 and ~C4 preactivated TMD transitions into a trajectory that begins  
465 with the resting state and ends with the activated state suggests a progression of JD  
466 rearrangements that facilitate gating in the pore (Figure 6A-F). First, retraction of the ARM2  
467 domains in the preactivated state results in a clockwise rotation of the JDs which is further  
468 magnified by  $\text{Ca}^{2+}$  binding in the preactivated+ $\text{Ca}^{2+}$  state. Once  $\text{Ca}^{2+}$  is bound, the channel can  
469 sample the ~C2 transition, where two opposing JDs shift outwards, disrupting the JD ring and  
470 leading to an outward movement of two of the four S6 helices. Then, the remaining two JDs  
471 are displaced away from the pore axis, resulting in a partial dilation of the pore. Finally, in the  
472 activated state, the JDs rotate about the helical axis of S6 to stabilize a fully-open pore where  
473 the hydrophobic gating residues Phe2513 and Ile2517 are repacked away from the permeation  
474 pathway. Notably, we do not observe any conformational changes in the pore helix or  
475 selectivity filter between the high-resolution closed and open states, indicating that the  
476 positions of Phe2513 and Ile2517 determine the gating state of the pore.

477 By serving as a transducer between the ligand-binding sites in the CD and the pore in  
478 the TMD, the JD is critical to regulating  $\text{IP}_3\text{R}$  gating. At the interface between the two segments  
479 of the JD is an ATP molecule (Figure 5H-I; Figure S11). There, the adenine moiety of ATP is  
480 nestled in a hydrophobic pocket between the two segments lined by Phe2156 from JD-A and  
481 Phe2539 and Ile2559 from JD-B (Figure 5I). The phosphate groups similarly bridge the two  
482 segments of the JD with the  $\alpha$ -phosphate coordinated by Lys2152 of JD-A and the  $\beta$ -  
483 phosphate coordinated by Lys2560 from JD-B. In cells, where ADP and ATP are abundant and  
484 the binding site should be predominantly occupied, ADP and ATP likely serve as molecular  
485 glue to hold the two discontinuous segments of the JD together. In the absence of ADP or  
486 ATP,  $\text{Ca}^{2+}$  binding may yield uncoupled movements of the two segments that would be a  
487 barrier to opening the pore, consistent with the prevailing model for ATP potentiation through  
488 sensitizing the channel to  $\text{Ca}^{2+}$  activation without affecting maximal open probability or high-  
489  $\text{Ca}^{2+}$  inhibition<sup>19,21</sup>. Supporting the critical role of a rigid JD domain in channel activation, even  
490 a single cysteine-to-serine mutation at the JD  $\text{Zn}^{2+}$  binding site results in a complete loss of  
491 function without diminishing protein expression or  $\text{IP}_3$  affinity<sup>68</sup>.



492 Subclasses with ~C2 and ~C4 distortions of the pore are also present in the ensemble  
493 of resting TMD transitions. In contrast to the preactivated TMD transitions, the JD ring remains  
494 intact in these subclasses, suggesting that conformation of the pore is not strictly coupled to  
495 that of the JD ring (Figure S15). The structural association between the JD ring and TMD in  
496 IP<sub>3</sub>R is thus weaker than the associations described between the pore and the cytosolic  
497 gating domains of other 6TM cation channels such as the BK channel (Slo1)<sup>69</sup>. Alternatively,  
498 given the resemblance to the resting state, this ensemble could represent a pathway that gives  
499 rise to the previously reported ultra-low probability channel openings at very low Ca<sup>2+</sup>  
500 concentrations that have been observed in the absence of IP<sub>3</sub><sup>70</sup>.

501

### 502 **Mechanisms of high Ca<sup>2+</sup> inhibition**

503 Compared to the states with Ca<sup>2+</sup> bound solely at the JD site, Ca<sup>2+</sup> binding at the CD  
504 site in the inhibited state is accompanied by large conformational changes throughout the CD  
505 (Figure 1B-F). The most prominent change is the disruption of the BTF ring, which results in  
506 the CDs of the four protomers moving away from one another and towards the membrane.  
507 Despite employing the same classification approaches that resulted in identification of several  
508 other low-abundance intermediates, we did not observe any transition states between BTF ring  
509 intact and BTF ring disrupted states, suggesting that loss of a single interprotomer interaction  
510 may be sufficient to disrupt the BTF ring in a highly-cooperative fashion. Due to the presence  
511 of a second Ca<sup>2+</sup> ion bound at the CD site, and because we previously demonstrated that BTF  
512 ring disruption insulates IP<sub>3</sub>-mediated conformational changes from the channel gate<sup>29</sup>, we  
513 hypothesized that this BTF ring-disrupted conformation is the high-Ca<sup>2+</sup> inhibited state of the  
514 channel. Consistent with BTF ring disruption being a key aspect of inhibition, mutations at the  
515 interface between BTF1 and BTF2 of the neighboring protomer can diminish or eliminate  
516 carbachol-induced Ca<sup>2+</sup> oscillations in cells (Figure S12X). Cells expressing a  
517 Trp168Ala/Lys169Ala mutant displayed no detectable increase in cytoplasmic Ca<sup>2+</sup> following  
518 carbachol stimulation, while only a single event could be observed in cells expressing a  
519 Lys169Ala mutant. These results corroborate mutagenesis experiments that predate structures  
520 of a full-length IP<sub>3</sub>R that yielded a graded effect on IP<sub>3</sub>-induced Ca<sup>2+</sup> release from microsomes,  
521 with single mutations at the BTF1-BTF2 interface diminishing release compared to wild-type  
522 channels, and two or more mutations resulting in no detectable Ca<sup>2+</sup> release<sup>71</sup>.

523 Coordination of a  $\text{Ca}^{2+}$  in the CD site of the inhibited state is achieved by the N-terminal  
524 portion of the CLD and ARM2 rotating towards one another by a total of 3 Å compared to their  
525 positions in the activated state (Figure 7B,C). Through ARM1, the rotation of the CLD pulls  
526 BTF1 and BTF2 outwards, away from the BTF domains of the neighboring protomers, while  
527 the rotation of ARM2 breaks its interaction with BTF1 of the neighboring protomer. From these  
528 observations,  $\text{Ca}^{2+}$  binding to the CD site stabilizes the BTF ring disrupted conformation.  
529 However, our data cannot discern if  $\text{Ca}^{2+}$  binding at the CD site is achieved through an  
530 induced fit mechanism or through conformational selection.

531 While  $\text{Ca}^{2+}$  binding at the CD site stabilizes the inhibited state,  $\text{Ca}^{2+}$  oscillations, which  
532 require both activation and high- $\text{Ca}^{2+}$  feedback inhibition<sup>47–50</sup>, can be detected in cells  
533 expressing the CD site mutant (Figure 3F-H). The ability of the CD site mutant to achieve an  
534 inhibited state indicates that the CD site is not essential for inhibition and that alternative  
535 mechanisms exist. The presence of higher-order assemblies of inhibited channels suggests  
536 one potential mechanism. Although the tetramers in these assemblies are globally quite similar  
537 to the isolated inhibited channels and densities can be observed in both  $\text{Ca}^{2+}$ -binding sites,  
538 they display an alternative  $\text{Ca}^{2+}$  dependence, suggesting that channels in higher-order  
539 assemblies may be functionally and structurally distinct from isolated inhibited channels.

540 The distinct properties of the tetramers in the higher-order assemblies may derive from  
541 the extensive state-specific interactions that stabilize the two-fold symmetric arrangement of  
542 the assembled tetramers. Four flexible linkers, which are disordered in all other states, adopt  
543 ordered conformations in assembled tetramers that contribute greatly to the two 2034 Å<sup>2</sup> inter-  
544 tetramer interfaces (Figure 7G). Loop 1 (Ala1556-Asp1587), connecting the C-terminal end of  
545 ARM2 to the CLD, contributes the largest surface by snaking along the adjacent tetramer's  
546 CLD (Figure S4A,G). Loop 2 (Pro1003-Met1023) protrudes out from the CLD to interact with  
547 Loop 3 (Phe1036-Met1044) from the adjacent tetramer (Figure S4B-C,H). Lastly, Loop 4  
548 (Ser679-Glu690) from the CLD of the adjacent tetramer partially condenses along the inside of  
549 ARM2 (Figure S4D,I). Together, these interactions result in a 52° angle between adjacent  
550 tetramers suggesting that this architecture would be favored in highly curved membranes such  
551 as the tubular ER network (Figure 7F)<sup>72,73</sup>.

552 Higher-order assemblies were notably absent from investigation of the other states. By  
553 docking a model of this assembly into the other states, we discerned that the conformational

554 restrictions imposed by an intact BTF ring allow only a single interaction to form between  
555 tetramers in the preactivated, preactivated+Ca<sup>2+</sup>, and activated states (Figure 7H-I). In the  
556 resting state, the extended position of ARM2 would preclude all such interactions from  
557 occurring. Together, these state-specific interactions favor the adoption of a distinct inhibited  
558 state where they can occur in a reciprocal fashion. Although there is a substantial entropic cost  
559 to these linkers adopting stable conformations, the highly ordered nature of these loops and  
560 their extensive interactions suggest that the enthalpic gains from their ordering result in an  
561 overall reduction of free energy. In the inhibited state the increased flexibility of the CD  
562 following BTF ring disruption may offset this entropic penalty. Supporting this notion, the  
563 kinetics of both elementary Ca<sup>2+</sup> responses<sup>74</sup> and global Ca<sup>2+</sup> oscillations<sup>75</sup> in cells exhibit  
564 strong temperature dependence.

565

566 **Flexibility of the C-terminal domain is driven by sampling acidic patches on the BTF**  
567 **ring**

568 The CTD forms a four helix coiled-coil that extends through the center of the CD,  
569 connecting the JD to the BTF ring in its intact conformations (Figure S17). While functional  
570 analyses of the CTD have provided conflicting results<sup>68,76,77</sup>, its central position led to the  
571 proposal that it may serve as an allosteric link between the IP<sub>3</sub>-binding sites in the CD and the  
572 pore<sup>30</sup>. In hIP<sub>3</sub>R3, the CTD is poorly resolved due to its flexibility. Focused refinement and  
573 3DVA revealed that a portion of the CTD of hIP<sub>3</sub>R3 alternatively interacts with eight negatively  
574 charged patches on the inside of the BTF ring (Figure S17A-B). While the limited resolution  
575 precludes building a model for the CTD, a conserved region of positively charged residues  
576 from Arg2654 to Arg2659 is the most likely candidate to bind to the negative patches on the  
577 BTF ring (Figure S17C). The CTD adopts two conformations which are most apparent in the  
578 activated state, interacting with four of the eight patches in either ~C2 or ~C4 configurations  
579 (Figure S17B; Movie M2-8), a noteworthy coincidence given the ~C2 and ~C4 TMD transition  
580 states. We investigated the essentiality of the CTD by truncating the channel at Leu2629 and  
581 monitoring the effects on IP<sub>3</sub>R-mediated Ca<sup>2+</sup> oscillations. We found that while the CTD  
582 deletion (dCTD) mutant produced Ca<sup>2+</sup> oscillations with a rising-phase slope that is  
583 comparable to wild-type channels, the mean inter-spike interval of 12.2 seconds is significantly

584 shorter (Figure S12M-O). Therefore, while the CTD is not essential for channel activity, CTD  
585 deletion does alter  $\text{Ca}^{2+}$  dynamics in cells.

586

## 587 **Discussion**

588 Here we defined the conformational landscape that underlies the biphasic  $\text{Ca}^{2+}$   
589 dependence of  $\text{IP}_3\text{Rs}$  and gives rise to  $\text{IP}_3\text{R}$ -dependent  $\text{Ca}^{2+}$  oscillations in cells. Ordering the  
590 states based on their  $\text{Ca}^{2+}$  dependence frames a model for the ligand-dependent activation  
591 and inhibition of  $\text{IP}_3\text{Rs}$  (Figure 8).  $\text{IP}_3$  generated in response to extracellular stimuli can bind to  
592 the ligand-free channel without altering its global conformation, yielding the low-energy resting  
593 state. Once bound to the resting state,  $\text{IP}_3$  enables the progression through the resting-to-  
594 preactivated transitions to the higher energy preactivated state, which appears to have a  
595 greater affinity for  $\text{Ca}^{2+}$ . With the increased affinity, basal  $\text{Ca}^{2+}$  in the cytosol would then be  
596 able to bind to the JD site, unlocking the JD ring and favoring the transition through the  
597 ensemble of high-energy intermediate states along the trajectory to the fully-open activated  
598 state. Upon opening,  $\text{IP}_3\text{Rs}$  release  $\text{Ca}^{2+}$  in the cytosol where it can bind to the low-affinity CD  
599 site and stabilize the inhibited state to terminate  $\text{Ca}^{2+}$  release. With  $\text{IP}_3\text{Rs}$  closed, SERCA  
600 would be able to pump  $\text{Ca}^{2+}$  back into the ER and restore basal  $\text{Ca}^{2+}$  concentrations. As  $\text{Ca}^{2+}$   
601 is sequestered back into the ER,  $\text{Ca}^{2+}$  can dissociate from the low-affinity CD site. When the  
602 BTF ring reforms, subsequent  $\text{Ca}^{2+}$  release events can then be initiated if  $\text{IP}_3$  remains  
603 abundant, resulting in regenerative  $\text{Ca}^{2+}$  oscillations.

604 Thus, the conformational landscape of  $\text{hIP}_3\text{R3}$  is comprised of multiple structurally  
605 distinct closed states and seemingly only one open state. Notably, ligand binding is not  
606 sufficient to determine conformational state, as distinct states exhibit identical ligand-binding  
607 profiles. For example, the preactivated+ $\text{Ca}^{2+}$  and activated states both bind  $\text{IP}_3$ , ATP, and  $\text{Ca}^{2+}$   
608 at the JD site, yet the pore is closed in the preactivated+ $\text{Ca}^{2+}$  state and open in the activated  
609 state (Figure 1). Similarly, the resting and preactivated states, as well as the intermediate  
610 resting-to-preactivated states, all bind  $\text{IP}_3$  and ATP, but not  $\text{Ca}^{2+}$  (Figure 1). Thus, the free  
611 energy gains associated with ligand binding are insufficient to drive the ligand-induced  
612 conformational changes, such as priming and gating, to completion. Rather, ligand binding  
613 biases the conformational equilibrium to increase the favorability of the high-energy states  
614 along the trajectory to activation.

615 While the trajectory to activation is populated with numerous high-energy states, the  
616 resting and inhibited states serve as the lowest energy states in the low and high  $\text{Ca}^{2+}$   
617 conditions, respectively. As the resting and inhibited states are both closed, their alternating  
618 free energy profiles contribute towards establishing the biphasic  $\text{Ca}^{2+}$  dependence of  $\text{IP}_3\text{Rs}$ .  
619 This energetic landscape presents a highly tunable system where post-translational  
620 modifications, protein-protein interactions, membrane lipid content, and other forms of  
621 regulation can tune the balance of states to modulate activation or alter the frequency and  
622 amplitude of  $\text{Ca}^{2+}$  waves without disturbing the principal biphasic  $\text{Ca}^{2+}$  dependence of the  
623 channel. Consistent with this model, we identified several mutations that change the  
624 conformational landscape resulting in altered  $\text{IP}_3\text{R}$ -dependent  $\text{Ca}^{2+}$  oscillation dynamics  
625 without abolishing activation or inhibition of the channel (Figures 3F-H, 4J-L, 6J-I and S12V-X).  
626 We also identified a second set of mutations that abolished  $\text{Ca}^{2+}$  oscillations, likely by  
627 removing one or more critical states from the conformational network (Figures 3I-K, 7J-L and  
628 S12R-U). Thus, our structural landscape provides a framework for understanding how diverse  
629 stimuli modulate  $\text{Ca}^{2+}$  dynamics in cells <sup>54,78,24</sup>.

630 Electrophysiological analyses have demonstrated that inhibition of  $\text{IP}_3\text{R3}$  is highly  
631 cooperative, while activation is not <sup>19,79</sup>. These observations are consistent with the existence  
632 of multiple asymmetric states along the trajectory to activation and the complete absence of  
633 states along the trajectory to inhibition. The absence of any channels with partially disrupted  
634 BTF rings likely arises from the strain that accompanies  $\text{Ca}^{2+}$  binding. Once even a single  
635 interface in the BTF ring is disrupted, the strain throughout the channel may cause the other  
636 interfaces to be pulled apart, resulting in the inhibited state. While the CD adopts several  
637 asymmetric states in the resting-to-preactivated transitions, all of the observed states display  
638 at least two-fold pseudosymmetry in the TMD. The lack of lower symmetries in the TMD may  
639 arise from the domain-swapped arrangement of the S1-S4 domain with respect to the pore,  
640 which assures cross-protomer communication. Similar  $\sim\text{C2}$  states have been observed for  
641 TRP channels, which share the domain-swapped 6TM fold <sup>80-82</sup>. The presence of multiple  
642 transition states resolved in our analysis of  $\text{hIP}_3\text{R3}$  thus contrasts with two prior structural  
643 titrations of the Slo2.2 and GIRK  $\text{K}^+$  ion channels where intermediate states were noticeably  
644 absent and the transitions from open to closed were highly cooperative processes <sup>46,83</sup>. As  
645 electrophysiological analyses of Slo2.2 and GIRK also demonstrate this cooperativity, the

646 correspondence between the structural and functional titrations of these three ion channels  
647 indicates that structural titrations can provide mechanistic insights into the processes that  
648 underly protein function.

649 It has long been appreciated that IP<sub>3</sub>Rs can function in higher-order assemblies, or  
650 clusters, that alter channel activity<sup>84</sup>. Our studies provide structural evidence for the  
651 mechanistic underpinnings of this regulation. We observe channels in higher-order assemblies  
652 exclusively when they adopt the BTF ring disrupted inhibited state. These state-specific  
653 assemblies would allow nearby channels to transition into the inhibited state in a synchronous  
654 manner, consistent with previous analyses demonstrating that the termination of elementary  
655 IP<sub>3</sub>R Ca<sup>2+</sup> signals produced by channels in close proximity are not completely independent  
656<sup>85,86</sup>. Notably, formation of these higher-order assemblies requires that the ARM2 domains be  
657 in the IP<sub>3</sub>-stabilized retracted conformation, explaining why IP<sub>3</sub> is required for cluster formation  
658<sup>87,88</sup>. Intriguingly, the abundance of the higher-order assemblies reaches a plateau at 100 nM  
659 Ca<sup>2+</sup>, the same concentration at which the activated state is most abundant, suggesting that  
660 the formation of the higher-order assemblies may be primarily driven by Ca<sup>2+</sup> binding to the  
661 high-affinity JD site, rather than the low-affinity CD site (Figure 2A). Ca<sup>2+</sup> binding at the JD site  
662 promoting inhibition would provide an elegant failsafe mechanism to avoid excessive Ca<sup>2+</sup>  
663 release and would explain how Ca<sup>2+</sup> oscillations can be observed in cells expressing the CD  
664 mutant.

665 Altogether, our analyses show how structural titrations, the process of determining  
666 structures in the presence of varying concentrations of regulatory ligands and co-factors, can  
667 reveal how stimuli bias the conformational landscape to modulate protein function.

668

669 **Data and Code Availability**

670 Cryo-EM maps and atomic coordinates have been deposited with the Electron Microscopy  
671 Data Bank and PDB under accession codes XXXX and EMDB-XXXX. Code is available at  
672 XXX. Summary data is available with the manuscript.

673

674

675 **Acknowledgements**

676 We thank Jason de la Cruz at the Memorial Sloan Kettering Cancer Center (MSKCC) Richard  
677 Rifkind Center for cryo-EM assistance with data collection and the MSKCC High-Performance  
678 Computing (HPC) group, in particular Neeraj Harikrishnan and Jamie Cheong, for assistance  
679 with data processing. We thank Ellen Zhong for discussions about conformational  
680 heterogeneity in cryo-EM data and Elizabeth Campbell, Seth Darst, Melinda Diver and  
681 Stephen B. Long for comments on the manuscript. This work was supported by NIH NCI  
682 Cancer Center Support grant P30 CA008748 (R.K.H.), NIGMS R01-GM13230704 (R.K.H.),  
683 NCI F31-CA243235 (N.P.), the Searle Scholars Program (R.K.H.) and the Josie Robertson  
684 Investigators Program (R.K.H.).

685

686 **Author Contributions**

687 N.P., V.S. and R.K.H. conceptualized the project and contributed to writing the manuscript.  
688 N.P. performed the bulk of cryo-EM analysis. V.S. performed the bulk of optical Ca<sup>2+</sup> imaging  
689 analysis. N.P., V.S. and R.K.H. assisted each other on all experiments and analysis.

690

691 **Competing Interests**

692 The authors declare no competing interests.

693

694

695 **Figures:**

**A Structural Ca<sup>2+</sup> Titration**

**Step 1:**

Apply purified channels to grids, incubate 30 seconds

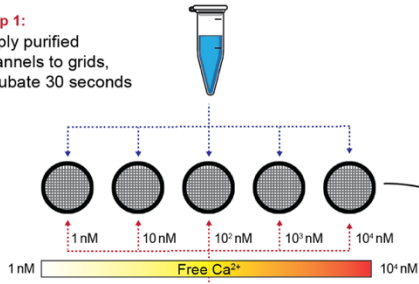

**Step 2:**

Add Ca<sup>2+</sup> buffer master mix to grids, immediately vitrify

| Chelator                 | K <sub>d</sub> |
|--------------------------|----------------|
| EDTA                     | 30 nM          |
| EGTA                     | 127 nM         |
| BAPTA                    | 153 nM         |
| HEDTA                    | 4.8 μM         |
| ATP (1 mM)               | 183 μM         |
| IP <sub>3</sub> (200 μM) | -              |

**Step 3:**  
Collect micrographs

**Step 4:**  
Merge data for image processing

**B Resting State**

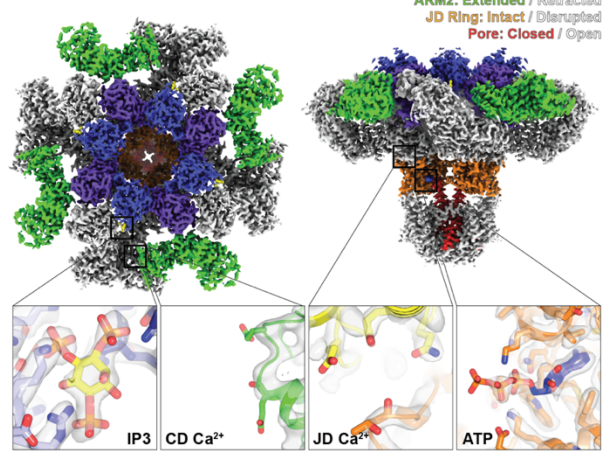

**C Preactivated State**

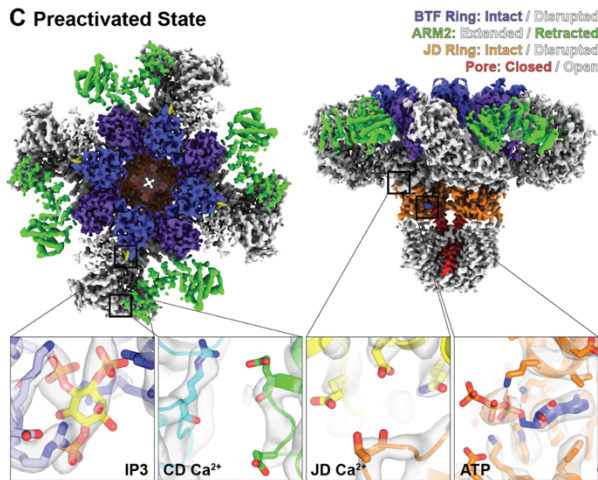

**D Preactivated State (+Ca<sup>2+</sup>)**

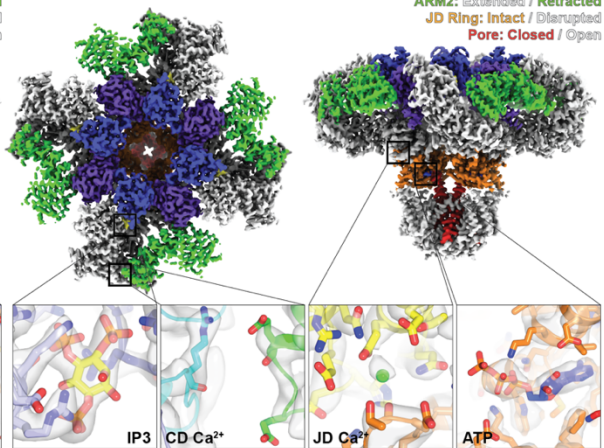

**E Activated State**

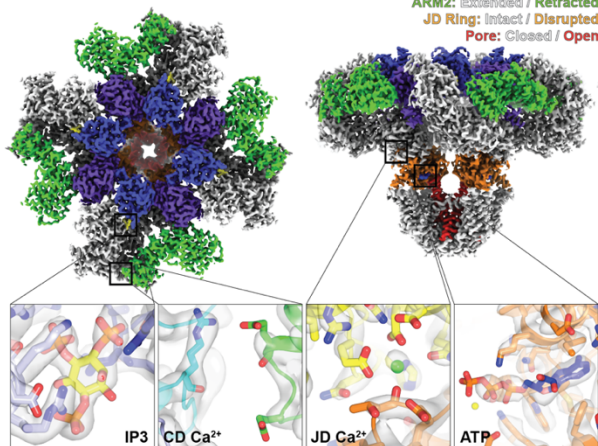

**F Inhibited State**

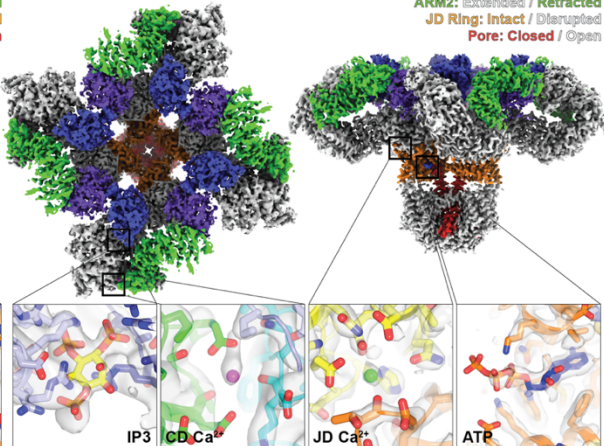

696

697 **Figure 1: Structural Ca<sup>2+</sup> titration of hIP<sub>3</sub>R3.** (A) Schematic for cryo-EM Ca<sup>2+</sup> titration of  
 698 hIP<sub>3</sub>R3. (B-F) C4-symmetrized composite cryo-EM density maps viewed from the cytosol (left)  
 699 and the side (right) with structural heuristics (top-right corner) and ligand binding status  
 700 (bottom insets for IP<sub>3</sub>, CD Ca<sup>2+</sup>, JD Ca<sup>2+</sup>, and ATP) for the (B) resting, (C) preactivated, (D)  
 701 preactivated+Ca<sup>2+</sup>, (E) activated, and (F) inhibited states.



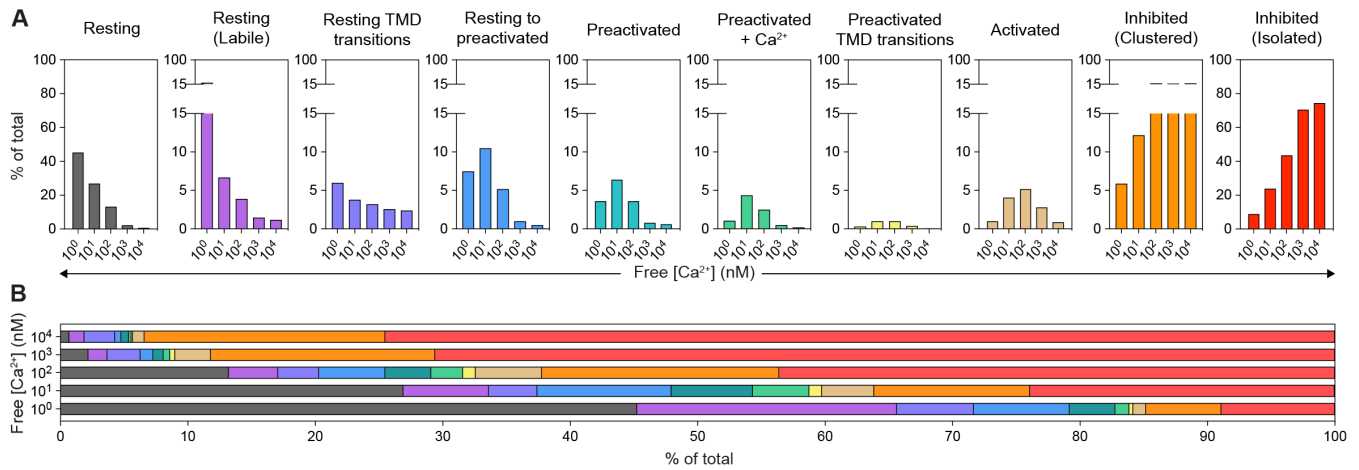

702

703

704

705

706

707

**Figure 2:** Ca<sup>2+</sup>-dependent conformational landscape of hIP<sub>3</sub>R3. **(A)** Relative percent abundance across the Ca<sup>2+</sup> titration (1 nM, 10 nM, 100 nM, 1 μM, and 10 μM) for the five major states and the ensembles of minor states (denoted by \*). Note that the Y-axis is truncated for several low-abundance states. **(B)** Aggregate abundances of all states across the Ca<sup>2+</sup> titration.

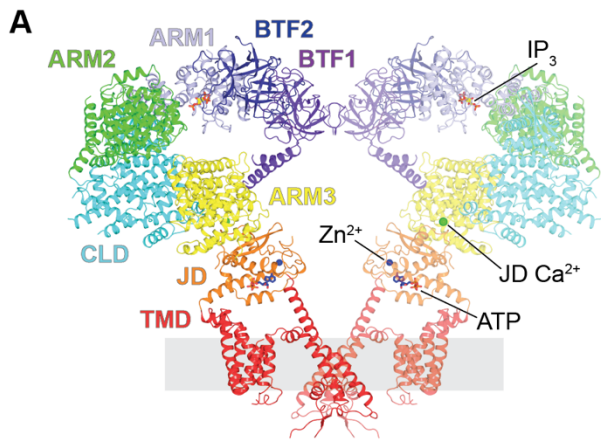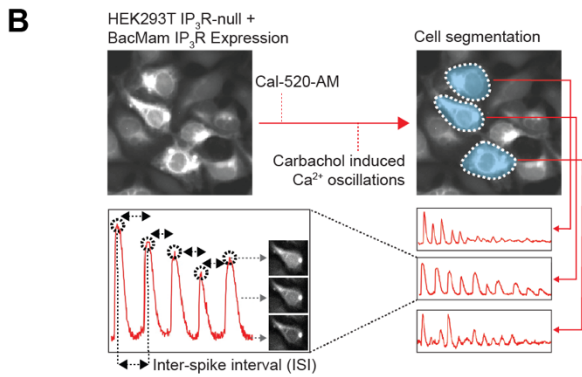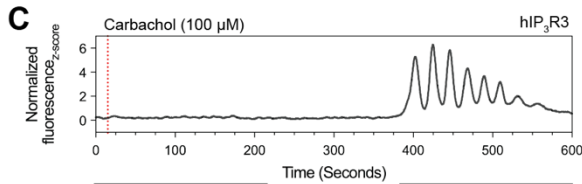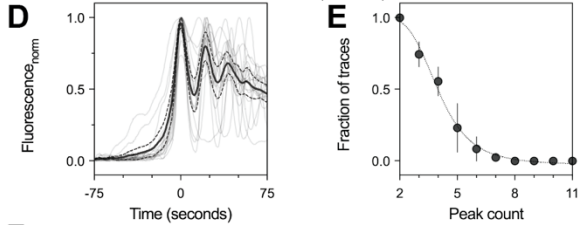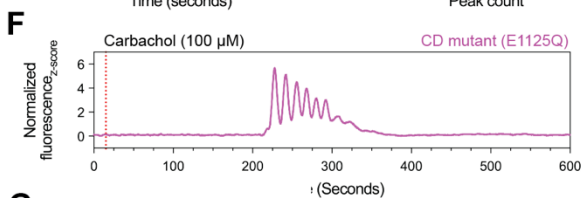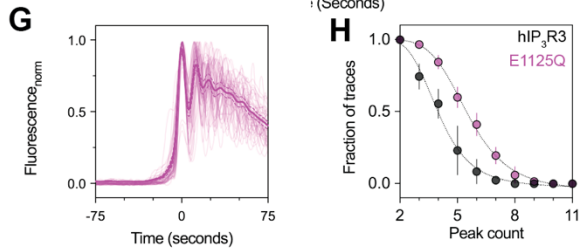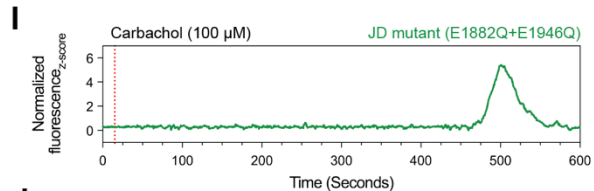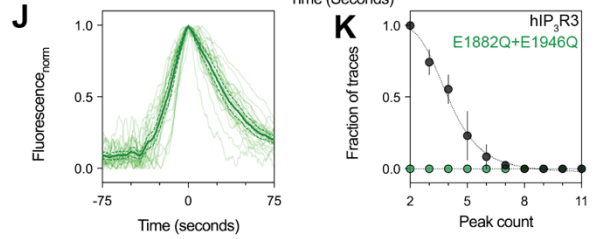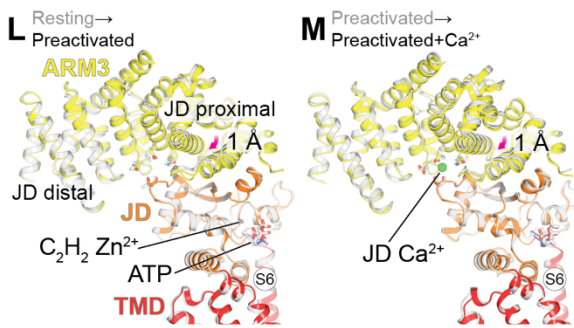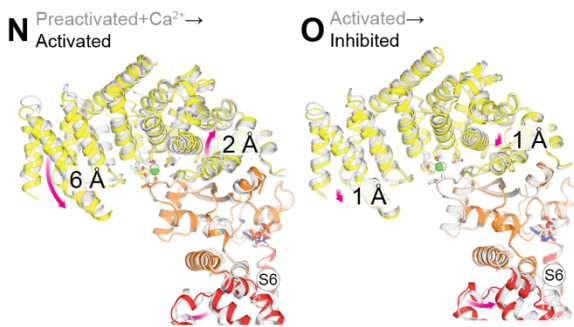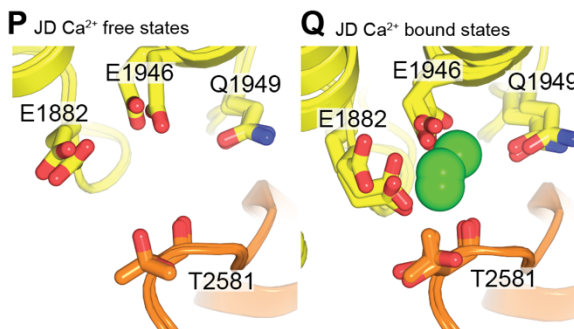

709 **Figure 3: Ca<sup>2+</sup> binding to the JD site has diverse effects on channel conformation. (A)**  
710 Side view of the activated state highlighting domain architecture on the left protomer and  
711 ligand binding sites on the right protomer. Front and rear protomers removed for clarity. **(B)**  
712 Schematic describing Cal-520-AM fluorescence based Ca<sup>2+</sup> imaging assay and data analysis.  
713 **(C,F,I)** Representative z-score normalized Cal-520-AM fluorescence traces recorded from cells  
714 expressing (C) hIP<sub>3</sub>R3, (F) CD mutant (E1125Q) and (I) JD mutant (E1882Q+E1946Q) in an  
715 IP<sub>3</sub>R-null background following stimulation by carbachol. **(D,G,J)** Aligned first peak of every  
716 oscillatory trace (thin lines) normalized to 1 for (D) hIP<sub>3</sub>R3, (G) CD mutant (E1125Q) and (J)  
717 JD mutant (E1882Q+E1946Q). Bold line represents mean and dashed lines represent 95%  
718 confidence interval. **(E,H,K)** Peak count distributions for all oscillatory traces observed for (E)  
719 hIP<sub>3</sub>R3, (H) CD mutant (E1125Q) and (K) JD mutant (E1882Q+E1946Q). Individual points  
720 represent mean and error bars represent S.E.M. **(L-O)** Superpositions of the ARM3-JD  
721 interface aligned by the JD for transitions from (L) resting to preactivated, (M) preactivated to  
722 preactivated+Ca<sup>2+</sup>, (N) preactivated+Ca<sup>2+</sup> to activated, and (O) activated to inhibited. Magenta  
723 arrows highlight movements of the proximal and distal regions of the JD between states. **(P-Q)**  
724 Superpositions of the JD Ca<sup>2+</sup> binding site in the (P) Ca<sup>2+</sup>-free states and (Q) Ca<sup>2+</sup>-bound  
725 states.  
726  
727  
728

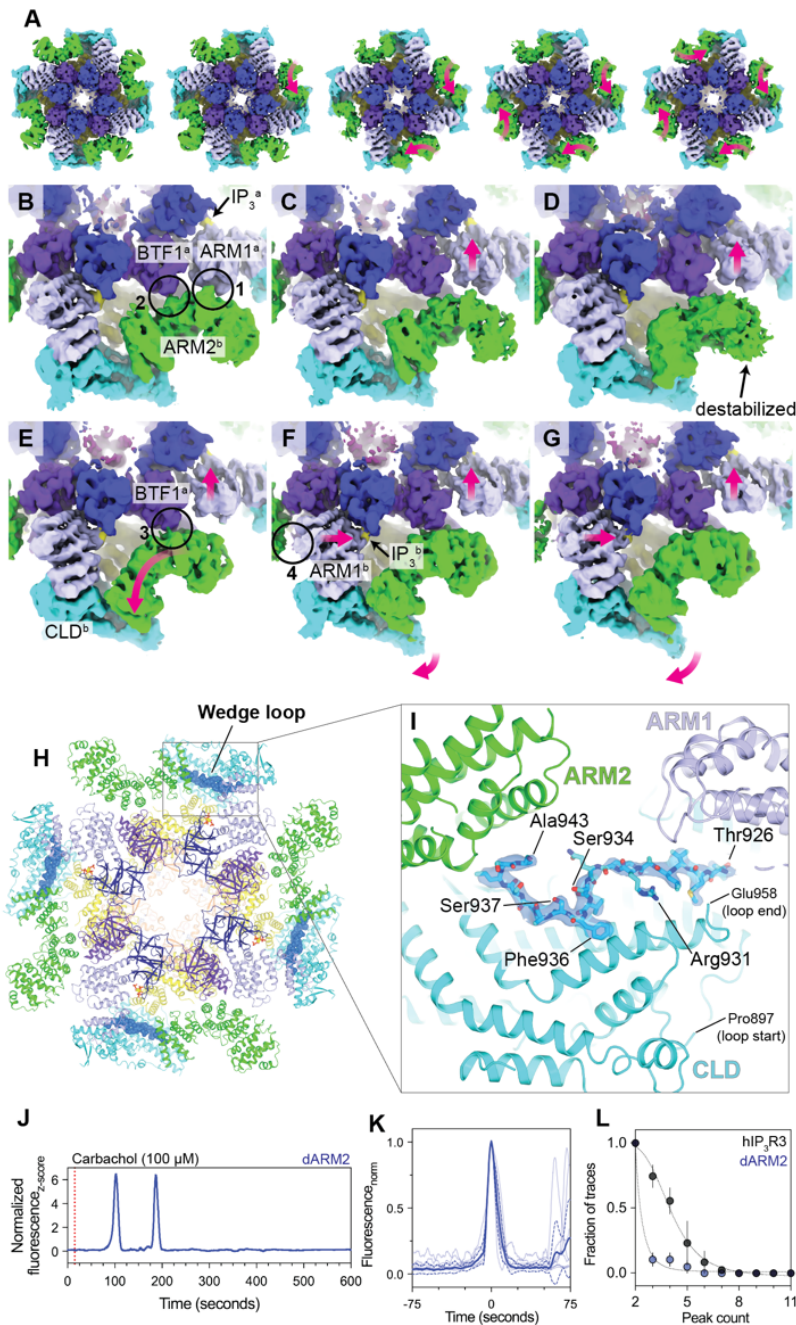

729

730

731 **Figure 4:  $IP_3$  primes the channel for activation via a cooperative process involving**  
 732 **ARM2. (A)** Cryo-EM density for five states showing a distribution of ARM2 positions between  
 733 the fully-extended resting state (left) and fully-retracted preactivated state (right). The three  
 734 intermediates in the middle are derived from the resting-to-preactivated transitions. Magenta  
 735 arrows highlight movements of the ARM2 domains compared to the preceding panel. **(B-G)**  
 736 Cryo-EM density trajectory of the progression of protomer b from the extended state to the  
 737 retracted state. **(B)** ARM2<sup>b</sup> forms two interactions with the adjacent protomer at circles 1 and 2

738 in the ARM2 extended state. The IP<sub>3</sub> bound to adjacent protomer a is highlighted. (C) The first  
739 movement is the displacement of ARM1<sup>a</sup> away from ARM2<sup>b</sup>, which is highlighted by a pink  
740 arrow. (D) A further displacement of ARM1<sup>a</sup> away is accompanied by a destabilization of the  
741 distal end of ARM2<sup>b</sup>. (E) ARM2<sup>b</sup> is repositioned into the retracted conformation near CLD<sup>b</sup>  
742 where ARM2<sup>b</sup> can contact BTF1<sup>a</sup> at circle 3 as ARM2<sup>a</sup> continues to move towards IP<sub>3</sub><sup>a</sup>. (F)  
743 Once the ARM2<sup>b</sup> adopts the retracted conformation, ARM1<sup>b</sup> can move towards the bound IP<sub>3</sub>  
744 of protomer b, repeating the progression. This process results in torsion of the CLD<sup>b</sup>. (G) The  
745 movements reach their extremes in the retracted conformation. Magenta arrows highlight  
746 domain movements compared to the preceding panel. **(H)** Resting state shown as cartoon  
747 viewed from the cytosol with wedge loop shown as blue spheres. **(I)** The wedge loop occupies  
748 a cavity between ARM1, ARM2 and the CLD in the resting state. Ordered residues within the  
749 wedge loop are depicted as sticks. Cryo-EM density for the wedge loop is shown as a blue  
750 isosurface. **(J)** Representative z-score normalized Cal-520, AM fluorescence trace recorded  
751 from a cell expressing the dARM2 mutant in an IP<sub>3</sub>R-null background following stimulation by  
752 carbachol. **(K)** Aligned first peak of every oscillatory trace (thin lines) normalized to 1. Bold  
753 lines represent mean and dashed lines represent 95% confidence interval. **(L)** Distribution of  
754 peak counts for all oscillatory traces. Individual points represent mean and error bars represent  
755 S.E.M.  
756  
757

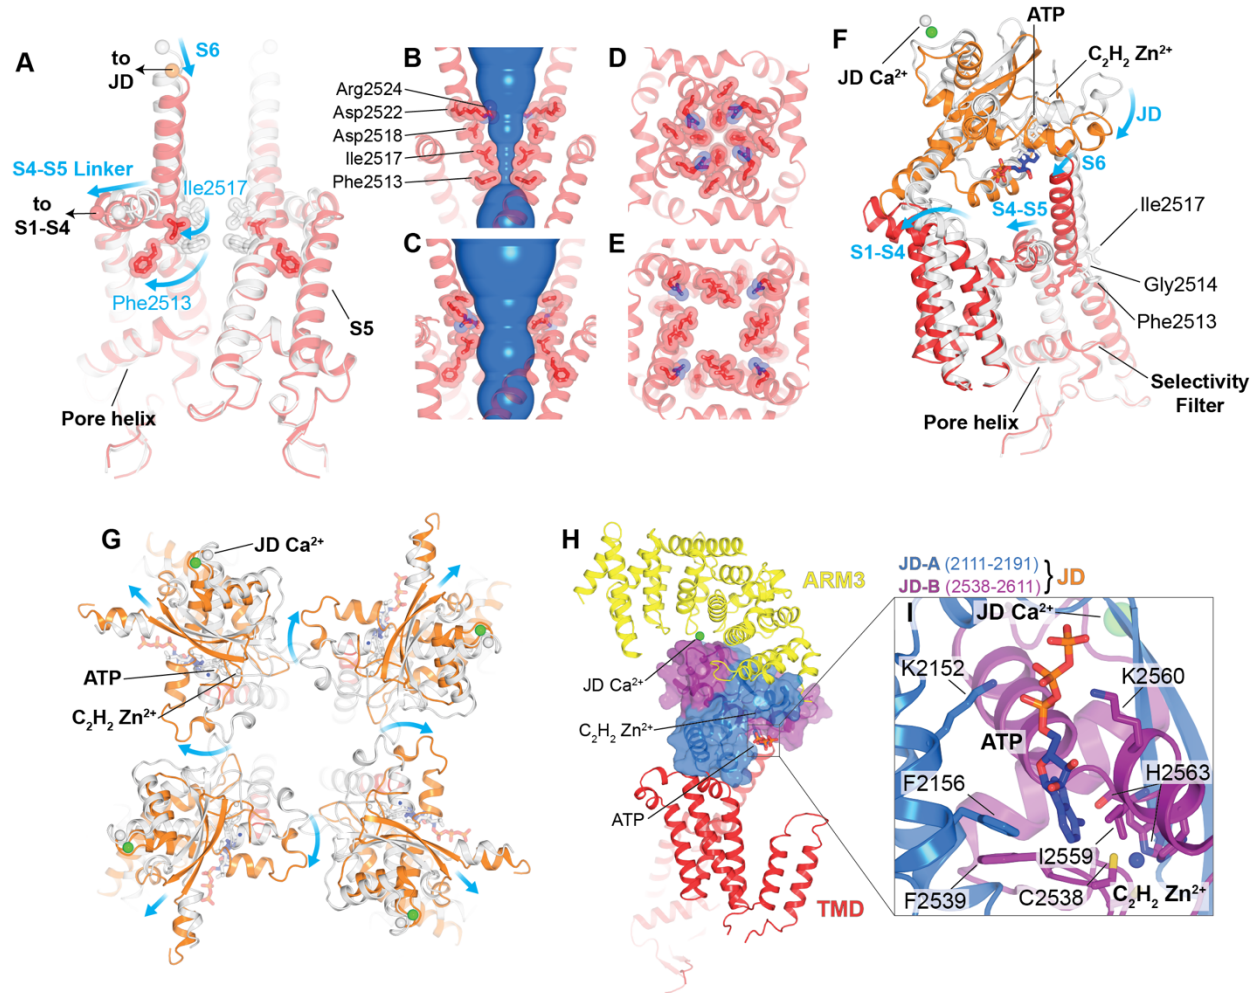

758

759 **Figure 5: Mechanism of activation.** (A) Superposition of the pore of the preactivated+Ca<sup>2+</sup>  
 760 (gray) and activated states (red), aligned by the luminal halves of S5 and S6, pore helix and  
 761 selectivity filter. Front and rear protomers removed for clarity. Blue arrows highlight movement  
 762 of S6, S4-S5 linker, and gating residues Phe2513 and Ile2517. Black arrows show where the  
 763 pore connects to S1-S4 domain and JD. (B-C) HOLE diagram showing solvent-accessible  
 764 surface area of conduction pathway in (B) preactivated+Ca<sup>2+</sup> and (C) activated states. (D-E)  
 765 Top view of constriction in (D) preactivated+Ca<sup>2+</sup> and (E) activated states. (F) Comparison of  
 766 TMD and JD of a single protomer of preactivated+Ca<sup>2+</sup> (gray) and activated (colored) states  
 767 aligned as in A. Blue arrows highlight the movements of the JD, S1-S4 bundle, S6, and the S4-  
 768 S5 linker. Bending and rotation of S6 occurs at Gly2514 enabling Phe2513 and Ile2517 to  
 769 repack behind the pore. (G) Comparison of JD ring of preactivated+Ca<sup>2+</sup> (gray) and activated  
 770 (colored) states viewed from the cytosol and aligned as in A. Arrows depict the movements  
 771 that result in JD ring disruption during activation. (H) The JD (shown here in the activated  
 772 state) is composed of two fragments JD-A (blue) and JD-B (purple). It is positioned between  
 773 ARM3 and the TMD, and contributes to the JD Ca<sup>2+</sup>, ATP, and Zn<sup>2+</sup> binding sites. (I) Inset  
 774 highlights the ATP and Zn<sup>2+</sup> binding sites at the interface between JD-A and JD-B.

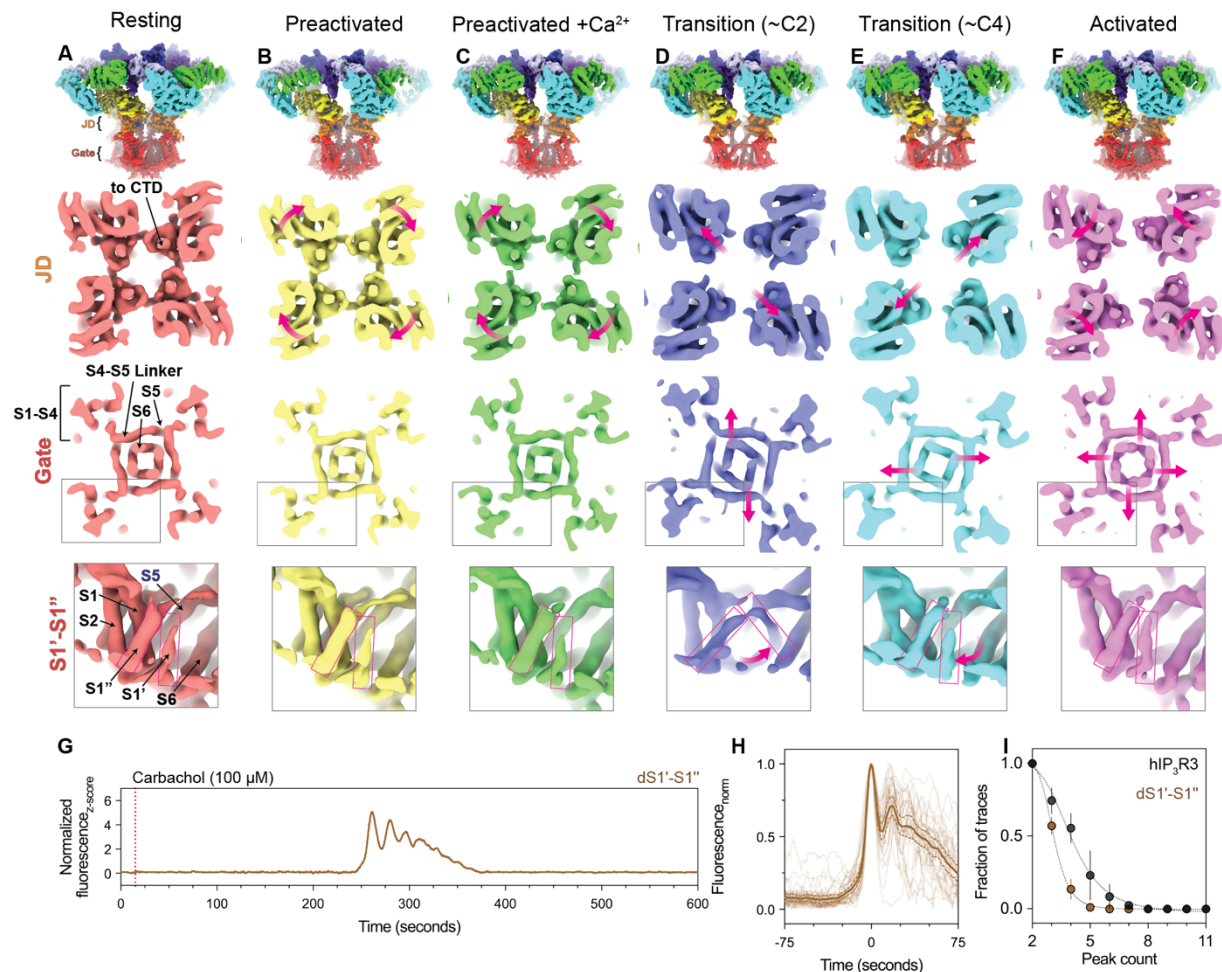

775

776

777 **Figure 6: Snapshots of the conformational rearrangements in the JD and TMD that**  
 778 **enable gating. (A-F)** Cryo-EM density maps of the (A) resting, (B) preactivated, (C)  
 779 preactivated+Ca<sup>2+</sup>, (D) ~C2 preactivated TMD transition, (E) ~C4 preactivated TMD transition,  
 780 (F) activated, and (G) inhibited states, low-pass filtered to 4 Å (overall) or 7 Å (slices). **Row 1:**  
 781 Overall cryo-EM density viewed from the side. **Row 2:** density slice looking from the cytosol at  
 782 the height of the JD ring with magenta arrows highlight movements of the JDs. **Row 3:** density  
 783 slice looking from the cytosol at the height of the gate with magenta arrows highlighting  
 784 movements of the S6 helices. **Row 4:** Side view of a single S1-S4 domain with a magenta box  
 785 highlighting the position of S1'-S1''. Magenta arrows denotes sequential movement of S1' in  
 786 the ~C2 and ~C4 preactivated TMD transition states. **(G)** Representative z-score normalized  
 787 Cal-520-AM fluorescence trace recorded from a cell expressing the dS1'-S1'' mutant in an  
 788 IP<sub>3</sub>R-null background following stimulation by carbachol. **(H)** Aligned first peak of every  
 789 oscillatory trace (thin lines) normalized to 1. Bold line represents mean and dashed lines  
 790 represent 95% confidence interval. **(I)** Distribution of peak counts for all oscillatory traces.  
 791 Individual points represent mean and error bars represent S.E.M.

792

793



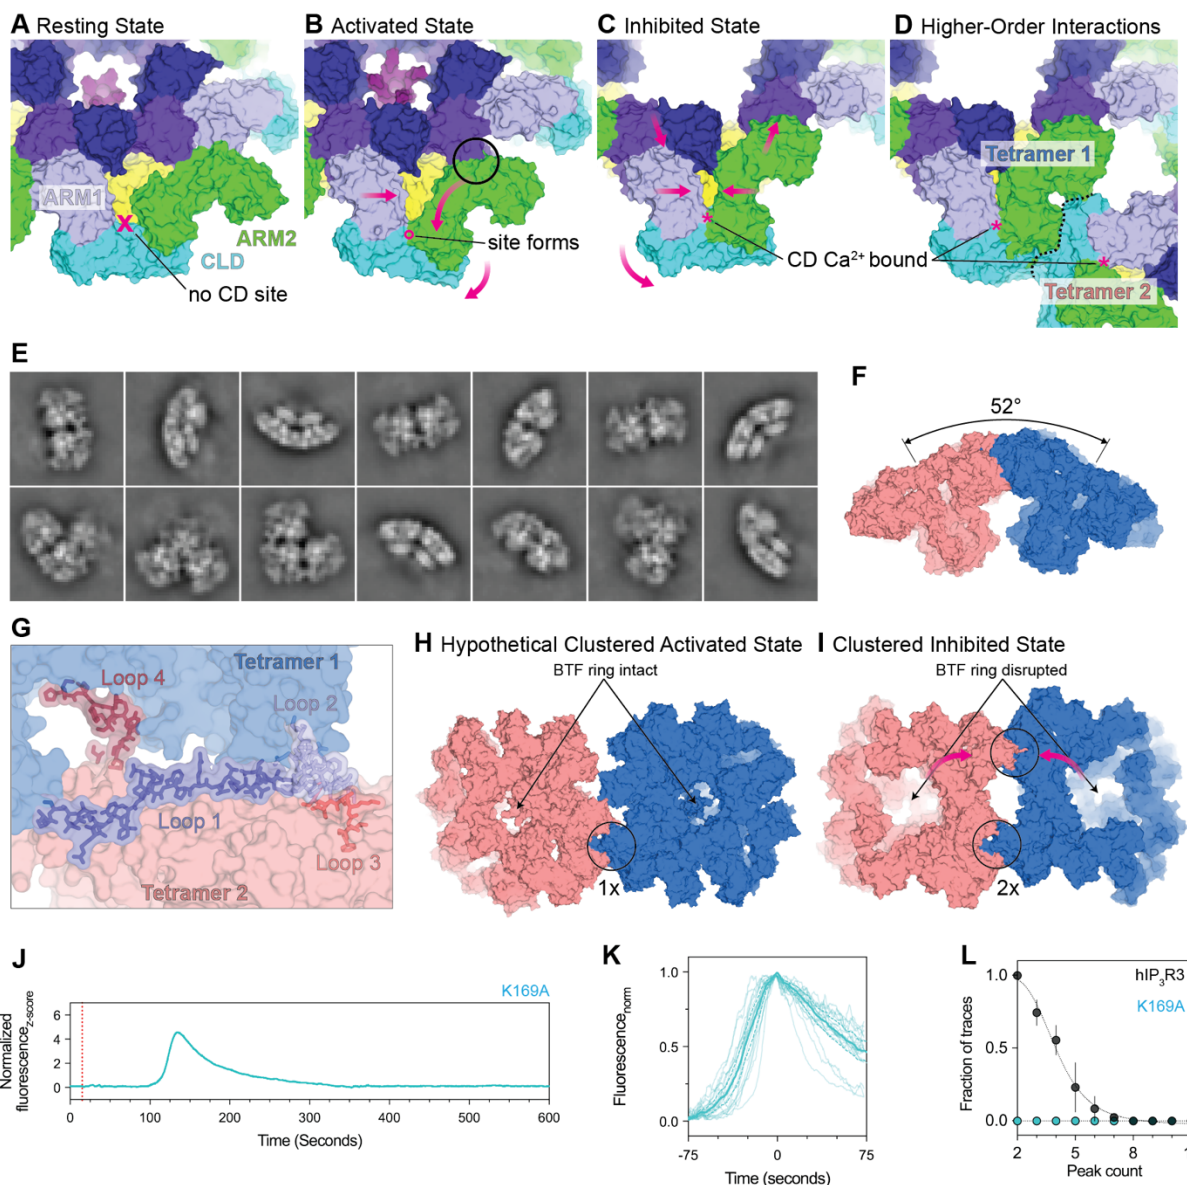

794  
795

796 **Figure 7: Mechanisms of high-Ca<sup>2+</sup> inhibition and clustering. (A-D)** Surface  
797 representations depicting the trajectory of a single protomer's CD from resting to CD Ca<sup>2+</sup>-  
798 bound clustered inhibited states. **(A)** In the resting state, the CD Ca<sup>2+</sup> binding site does not  
799 exist because ARM2 is extended away from the CLD and ARM1. Approximate location of the  
800 CD Ca<sup>2+</sup> binding site in ARM2 retracted states shown as an 'X'. **(B)** ARM2 retraction creates  
801 the CD Ca<sup>2+</sup> binding site in the preactivated, preactivated+Ca<sup>2+</sup>, and activated states, but no  
802 Ca<sup>2+</sup> is yet bound. A circle highlights an interaction between ARM2 and BTF2 of the adjacent  
803 protomer that restricts the movement of ARM2 and must be alleviated to accommodate Ca<sup>2+</sup>.  
804 **(C)** BTF ring disruption allows ARM2 to move further towards the CLD and bind the CD Ca<sup>2+</sup>  
805 ion. **(D)** Higher-order interactions can be formed between two tetramers in a ARM2 retracted,  
806 BTF ring disrupted conformations. Dashed line represents the boundary between the two

807 tetramers labeled Tetramer 1 and Tetramer 2 as in panel G. **(E)** Representative 2D averages  
808 of assemblies of 2-3 inhibited particles at different viewing angles. **(F)** Model of two adjacent  
809 tetramers shows a 52° angle implying a highly curved membrane environment. **(G)** Atomic  
810 model for four loops that form the higher-order interaction interface. **(H)** Modeling of a  
811 hypothetical higher-order interaction of the preactivated, preactivated+Ca<sup>2+</sup>, or activated state  
812 shows that steric restrictions imposed by the intact BTF ring allow only a single interaction to  
813 form between adjacent tetramers. **(I)** BTF ring disruption relieves this restriction and allows  
814 higher-order interactions to occur in a reciprocal fashion between adjacent tetramers. Magenta  
815 arrows highlight the movements of two CDs that together establish the second inter-tetramer  
816 interface. **(J)** Representative z-score normalized Cal-520-AM fluorescence trace recorded from  
817 a cell expressing the K169A mutant in an IP<sub>3</sub>R-null background following stimulation by  
818 carbachol. **(K)** Aligned first peak of every oscillatory trace (thin lines) normalized to 1. Bold line  
819 represents mean and dashed lines represent 95% confidence interval. **(L)** Distribution of peak  
820 counts for all oscillatory traces. Individual points represent mean and error bars represent  
821 S.E.M.  
822

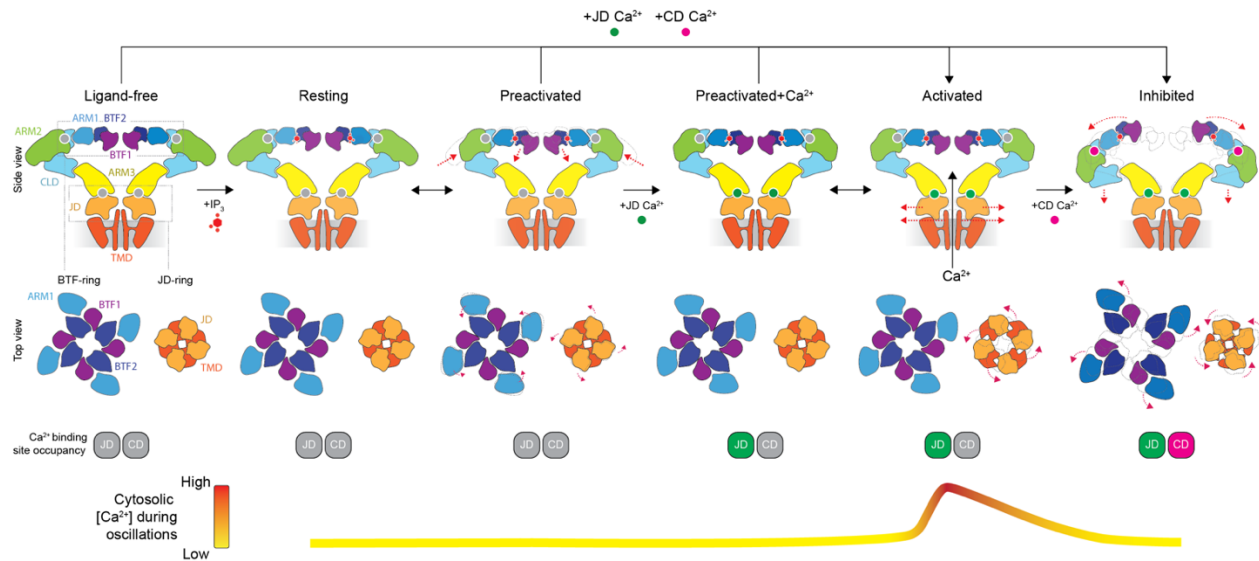

823

824

**Figure 8: Model for biphasic regulation of IP<sub>3</sub>Rs by cytosolic Ca<sup>2+</sup>.** Schematic

825

representations depicting the mechanisms of Ca<sup>2+</sup>- and IP<sub>3</sub>-dependent activation and Ca<sup>2+</sup>-

826

dependent inhibition of IP<sub>3</sub>Rs. **Row 1:** Side views of the major states with front and rear

827

protomers removed for clarity. **Row 2:** Cytosolic views of BTF-ring (left) and JD-ring (right).

828

Magenta arrows highlight movements compared to previous state. **Row 3:** Occupancy of Ca<sup>2+</sup>-

829

binding sites. **Row 4:** Correspondence between conformational state and cytosolic Ca<sup>2+</sup> during

830

Ca<sup>2+</sup> oscillations.

831

832

833

834 **Materials & Methods:**

835

836 **hIP<sub>3</sub>R3 expression:**

837 All constructs were N-terminally tagged with 10xHis followed by EGFP (Ca<sup>2+</sup> imaging) or  
838 mVenus (cryo-EM)<sup>89</sup> followed by human rhinovirus 3C protease<sup>90</sup> cut-site and then human  
839 type 3 IP<sub>3</sub>R. Plasmids were transformed into DH10Bac cells to generate bacmids as described  
840 previously<sup>29</sup>. 100-200 µg of purified bacmid in 1 mL water were incubated with 400 µg of  
841 25000 MW polyethyleneimine (PEI; Polysciences Cat# 23966) in 1 mL water at 55 degC for  
842 30-45 minutes to sterilize, then added to 50 mL of Sf9 cells at 1x10<sup>6</sup> cells/mL grown in  
843 suspension at 27-30 degC. The Sf9 TNMFH media was supplemented with 1%  
844 penicillin/streptomycin, 0.1% Pluronic F-68 non-ionic surfactant (Gibco Cat# 24040), and 4-8%  
845 fetal bovine serum to stabilize the virus. Virus titer was amplified to P3 and separated from cell  
846 debris by centrifugation. P3 virus was used to infect mammalian HEK293S GnTI- (ATCC CRL-  
847 3022) cells at a density of 3x10<sup>6</sup> cells/mL at a ratio of 50 mL virus for 800 mL cells and  
848 simultaneously stimulated with 3.75 mM valproic acid (VPA; Sigma Cat# P4543). Pellets were  
849 harvested from cells by centrifugation at 48-72 hours after infection and snap frozen.

850

851 **hIP<sub>3</sub>R3 purification:**

852 All surfaces, vessels, and transfer plastics were washed extensively with reverse  
853 osmosis water prior to use to minimize contaminating Ca<sup>2+</sup>. Membrane proteins were  
854 solubilized from 2.4 L of pelleted HEK293S GnTI- cells expressing wild-type hIP<sub>3</sub>R3 for 2 hours  
855 by rotation in 2% lauryl maltose neopentyl glycol (LMNG; Anatrace Cat# NG310), 150 mM  
856 sodium chloride (NaCl), 20 mM HEPES pH 7.5, 1 mM phenylmethylsulfonyl fluoride (PMSF),  
857 2.5 µg/mL aprotinin (Sigma Cat# A1153), 2.5 µg/mL leupeptin (Alfa Aesar Cat# J61188), 10  
858 µg/mL pepstatin A (GoldBio Cat# P-020-25), 0.5 mM 4-benzenesulfonyl fluoride hydrochloride  
859 (AEBSF; EMD Millipore Cat# 101500), and a few flakes of lyophilized deoxyribonuclease  
860 (DNAse; Worthington Biochemical Cat# LS002139). The resulting cell lysate was centrifuged  
861 at 75kxg for 40 minutes. The supernatant was incubated with sepharose-coupled GFP  
862 nanobody affinity purification beads for 4 hours with gentle agitation<sup>91</sup>. The protein-GFP-bead  
863 mixture was isolated in a column, and washed with 50 mL of gel filtration buffer containing 150  
864 mM NaCl, 50 mM Tris-HCl pH 8.0, 0.02% LMNG, and 2 mM dithiothreitol (DTT). The protein

865 was eluted from the affinity column by cleavage with genetically modified human rhinovirus 3C  
866 protease overnight. Size exclusion chromatography was performed with a Superose 6  
867 Increase column and the resulting protein peak was pooled and concentrated to 20 mg/mL in a  
868 1 mL, 100 kDa MWCO concentrator (Cytiva VivaSpin Cat# 28932258).

869

870 **Structural titration sample preparation:**

871 Cryo-EM sample blotting paper contributes a significant quantity of contaminating  $\text{Ca}^{2+}$   
872 to protein preparations. We opted to produce our own low- $\text{Ca}^{2+}$  blotting paper by treating  
873 standard blotting paper (Ted Pella Standard VitroBot Blotting Paper Cat# 47000-100) with an  
874 extensive washing protocol. Over several days and multiple buffer exchanges, we treated with  
875 approximately 6 L of 100  $\mu\text{M}$  EGTA in reverse osmosis (RO) water, then 6 L of RO water with  
876  $\text{Ca}^{2+}$  chelating beads (BIO-RAD Chelex 100 Resin Cat#142-1253), and finally 6 L of RO water  
877 alone. The treated paper was then stacked between extensively washed glass plates and  
878 subjected to vacuum for 24 hours to remove moisture and resume a flat shape. The treated  
879 filter paper is predicted to contain substantially less than 1 mM contaminating  $\text{Ca}^{2+}$  (predicted  
880 starting condition of blotting paper <sup>29</sup>) and 100  $\mu\text{M}$  residual EGTA (first wash condition).

881 To further control our sample  $\text{Ca}^{2+}$  concentrations, we engineered a  $\text{Ca}^{2+}$  chelating  
882 cocktail. By combining 2 mM each of EDTA (Kd 30 nM), EGTA (Kd 127 nM), BAPTA (Kd 153  
883 nM), HEDTA (Kd 4.8  $\mu\text{M}$ ) with 1 mM of ATP (Kd 183  $\mu\text{M}$ ), we calculate that our buffer ensures  
884 a semi-log-linear relationship between free and total  $\text{Ca}^{2+}$  from 1 nM to 300  $\mu\text{M}$  <sup>92</sup>. The least  
885 well-controlled range for free  $\text{Ca}^{2+}$  was between 1 nM and 10 nM requiring addition of 864  $\mu\text{M}$   
886 total  $\text{Ca}^{2+}$ , and the largest was between 10  $\mu\text{M}$  and 100  $\mu\text{M}$ , requiring addition of 2.0 mM total  
887  $\text{Ca}^{2+}$ . Thus, our total contaminating  $\text{Ca}^{2+}$  must be greater than 864  $\mu\text{M}$  to generate a maximum  
888 1-log-fold error in our target free  $\text{Ca}^{2+}$  across the entire titratable range, ensuring that we  
889 maintain the semi-log-linear relationship between free and total  $\text{Ca}^{2+}$  despite contaminating  
890  $\text{Ca}^{2+}$ . To minimize the impact of widely varying kinetic properties of the chelators, we  
891 generated a pre-mixed 5X solution containing 10 mM of each chelator, 5 mM ATP, 1 mM  $\text{IP}_3$ ,  
892 and 2.5 mM fluorinated fos-choline-8 (Anatrace Cat# F300F), a detergent that does not interact  
893 with hydrocarbons, to protect the protein from the air-water interface. Sensitivity analysis using  
894 MaxChelator  
895 (<https://somapp.ucdmc.ucdavis.edu/pharmacology/bers/maxchelator/webmaxc/webmaxcE.htm>)

896 ) revealed that inaccurate pH was the largest contributor to deviations from the predicted free  
897  $\text{Ca}^{2+}$ , and thus we carefully adjusted all solutions to pH 8, and added an additional 50 mM Tris  
898 pH 8.0 to the master mix.  $\text{CaCl}_2$  and  $\text{MgCl}_2$  were added in varying quantities to generate the  
899 desired free  $\text{Ca}^{2+}$  concentration and a constant 3 mM free  $\text{Mg}^{2+}$  concentration. During grid  
900 preparation, 3.2  $\mu\text{L}$  of purified protein was added to the grid and incubated for 30 seconds,  
901 after which we added 0.8  $\mu\text{L}$  of the ligand master mix directly to the droplet on the grid,  
902 immediately blotted with our low- $\text{Ca}^{2+}$  blotting paper for 2 seconds, then plunge-frozen using a  
903 ThermoFisher Vitrobot Mark IV. Since the  $\text{Ca}^{2+}$  and chelators are premixed, the free  $\text{Ca}^{2+}$  is at  
904 equilibrium in the master mix, and pipetting error when adding to the protein on the grid will  
905 have no effect on free  $\text{Ca}^{2+}$ . The only deviations due to pipetting error would be  $[\text{IP}_3]$  and  
906  $[\text{ATP}]$ , both of which are above saturating concentrations and so we assume those to be  
907 inconsequential for this analysis. The final grid conditions have varying free  $\text{Ca}^{2+}$ , but constant  
908 200  $\mu\text{M}$   $\text{IP}_3$ , 1 mM ATP, 3 mM free  $\text{Mg}^{2+}$ , 1.6 mM dithiothreitol (DTT), 2 mM EDTA, 2 mM  
909 EGTA, 2 mM BAPTA, 2 mM HEDTA, 50 mM Tris pH 8.0, 120 mM NaCl, 500  $\mu\text{M}$  fluorinated  
910 fos-choline-8, and 159  $\mu\text{M}$  LMNG.

911

### 912 **Cryo-EM data collection, analysis and model building:**

913 Images were collected at 0.826  $\text{\AA}/\text{px}$  magnification on an FEI Krios with Gatan K3  
914 detector at 15  $\text{e}^-/\text{pix}/\text{sec}$  with 3 sec exposure (0.05 sec/frame) for a total dose of 66  $\text{e}^-/\text{\AA}^2$  in  
915 automated fashion using SerialEM<sup>93,94</sup>. Five datasets were collected during the same session  
916 for each  $\text{Ca}^{2+}$  concentration on a series of grids that were prepared sequentially resulting in  
917 637 movies at 1 nM, 2150 movies at 10 nM, 6126 movies at 100 nM, 1372 movies at 1  $\mu\text{M}$ ,  
918 and 3136 movies at 10  $\mu\text{M}$ . A sixth dataset of 4312 movies collected at nominal 100 nM free  
919  $\text{Ca}^{2+}$  from a grid prepared later in the sequence was collected as a technical replicate to  
920 assess experimental error (Figure S16A).

921 All movies were combined and processed starting in CryoSparc Live v3.3.1 for motion  
922 correction, CTF estimation, and bias-free autopicking at a rate of 380 picks/micrograph with a  
923 gaussian blob of dimensions between 166 and 240  $\text{\AA}$ , corresponding to the smallest and  
924 largest diameter of the known conformational states of  $\text{IP}_3\text{Rs}$ . Thus, all of the following  
925 classification decisions were made in aggregate and without any *a priori* knowledge of the  
926 dataset from which particle subsets were derived. The over-picked particle stack was extracted

927 in a 512 box and subjected to iterative CryoSparc v3.3.1 Heterogeneous Refinement<sup>95</sup> with  
928 four references corresponding to the resting, activated, inhibited, and a single consensus  
929 average of the preactivated +/- Ca<sup>2+</sup> states. These references were previously determined from  
930 the combined data using traditional single-particle approaches. The remaining eight classes  
931 were pure noise decoy references generated by randomly sampling a very small number of  
932 particles via CryoSparc v3.3.1 Ab-Initio without alignment. The decoy references attract false  
933 positives, while the four high-resolution references attract true positives. These references  
934 were used for all classifications described herein.

935 After several rounds of “decoy” classification, the particle stack went from 7.8M particles  
936 to 1.7M particles, with 351k, 117k, 145k, and 1045k residing in the classes obtained from the  
937 resting, preactivated, activated, and inhibited references respectively. 2D classification of the  
938 discarded classes confirmed that no unintentional removal of true positives occurred. At this  
939 stage, each stack was independently subjected to an additional iteration of classification to  
940 allow fine separation of states whereby the non-self references attract particles away from the  
941 self-identifying class in cases where the particles deviate from the consensus state in subtle  
942 ways. This resulted in six classes that are depicted in the second tier of the cryo-EM workflow  
943 figure (Figure S2), with classes that refined to worse than 7 Å being discarded as junk or  
944 damaged particles.

945 Each of these six stacks were refined enforcing C4 symmetry to improve signal for  
946 reference-based corrections prior to Bayesian Polishing in Relion v3.1.3<sup>96</sup>. At this stage,  
947 optical groups were separated and both local and global CTF parameters were optimized in  
948 CryoSparc v3.1.1 during Non-Uniform Refinement<sup>97</sup> procedures. Due to the very large number  
949 of optical groups, it was found that the fourth-order terms of spherical aberration and tetrafoil  
950<sup>98,99</sup> were not being fit accurately in some groups, and hence we did not fit these terms. In  
951 aggregate the per particle, per micrograph, and per optical group corrections resulted in  
952 improvements for the resting-like stack with strong TMD density (231k particles; 3.5 Å to 2.7  
953 Å), resting-like stack with weak TMD density (108k particles; 3.9 Å to 3.3 Å), preactivated-like  
954 stack with weak CD density (83k particles; 4.0 Å to 3.6 Å), activated-like stack (65k particles;  
955 3.7 Å to 3.1 Å), preactivated-like stack with weak TMD density (76k particles; 3.8 Å to 3.2 Å),  
956 and inhibited-like stack (1045k particles; 3.2 Å to 2.5 Å). These stacks were subjected to one  
957 final round of classification revealing the five primary C4 symmetric states called resting (192k

958 particles; 2.8 Å), preactivated (47k particles; 3.7 Å), preactivated+Ca<sup>2+</sup> (31k particles; 3.6 Å),  
959 activated (56k particles; 3.1 Å), and inhibited (917k particles; 2.5 Å) states. Additionally, we  
960 identified several heterogeneous conformational ensembles that will be discussed after the five  
961 C4 symmetric states.

962 We further improved the C4 symmetric states by performing C4 symmetry expansion  
963 and local refinement to correct for subtle local asymmetries in the particles. We used a model  
964 to precisely delineate masks surrounding modular units that flex and move in unison: (1) a  
965 mask containing a single chain from the tetramer (2) the entire cytosolic domain consisting of  
966 residues 1-1697 from a single chain (3) BTF1, BTF2, and ARM1 consisting of residues 1-664  
967 from a single chain (4) CLD, ARM3 consisting of residues 665-1100 and 1586-2074 from a  
968 single chain (5) ARM2 consisting of residues 1101-1586 from a single chain (6) TMD, JD  
969 consisting of residues 2111-2611 from a single chain. The masks generated from these  
970 models were dilated by 4 pixels and a cosine soft-edge was applied for 40 pixels, thereby  
971 avoiding ringing and mask artifacts that occur when converting hard edges in real-space to  
972 reciprocal space. Therefore, this mask retains 100% of the information at ~3 Å away from the  
973 model, and 50% of the information at ~25 Å away from the model. CryoSparc v3.3.1 Local  
974 Refinement resulted in resolutions ranging from 2.5 Å (TMD/JD) to 3.3 Å (ARM2) for the  
975 resting state, 3.6 Å (TMD/JD) to 6.5 Å (ARM2) for the preactivated state, 3.3 Å  
976 (BTF1/BTF2/ARM1) to 4.2 Å (ARM2) for the preactivated+Ca<sup>2+</sup> state, 2.9 Å  
977 (BTF1/BTF2/ARM1) to 3.3 Å (ARM2) for the activated state, and 2.5 Å (TMD/JD) to 3.4 Å  
978 (BTF1/BTF2/ARM1) for the inhibited state (Figure S3, S5, S6, S7, S8). In some highly-  
979 heterogeneous cases, the local refinements were subjected to a procedure that will be  
980 described in the treatment of the conformational ensembles to improve the resolution (e.g.  
981 BTF1/BTF2/ARM1 in the inhibited state).

982 The local refinements were independently subjected to Phenix v1.20.1-4487 Resolve  
983 Cryo-EM<sup>100</sup> guided only by experimental density (no model) and employing a lenient mask  
984 that contains all proteinaceous and detergent micelle density, an approach we have used  
985 previously<sup>101–103</sup>. As part of the procedure, the final maps are sharpened using a half-map  
986 derived factor. The resulting density modified and sharpened maps were cropped to a single  
987 chain and used for iterative model building using coot<sup>104</sup>, ISOLDE<sup>105</sup> and composite map  
988 generation using a 20-residue sliding window cross-correlation (Phenix v1.20.1-4487 Combine



989 Focused Maps) <sup>106</sup>, which we found to produce artifact-free maps when compared to  
990 Chimera's 'vop maximum' command <sup>107</sup>. For the highest resolution composites (resting,  
991 activated, and inhibited) the density-modified local refinements were super-sampled prior to  
992 composite generation to aid interpretation of ligands, ions, and waters. Inspection of the  
993 resulting composite maps showed that they were free of model-based overfitting, for example  
994 density for ions, ligands, and lipids remain intact despite being removed from the input model.  
995 The final models were refined against the composite map with Phenix v1.20.1-4487 Real-  
996 Space Refinement <sup>108</sup>.

997 The remaining classes represent highly-heterogeneous conformational ensembles that  
998 we interrogated via 3D variability analysis (3DVA) <sup>36</sup>. We relaxed our assumptions about  
999 symmetry by performing C4 symmetry expansion on each class. For the resting-like ensemble  
000 with weak CD density, resting-like ensemble with weak TMD density, preactivated-like  
001 ensemble with weak CD density, and the preactivated-like ensemble with weak TMD density,  
002 we performed 3DVA with a full channel mask and filter resolution between 5-8 Å and clustered  
003 each of 3 modes independently into 5 groups. Occasionally, one or two clusters would be  
004 populated with very few particles, suggesting that a fewer number of clusters was adequate to  
005 represent the underlying heterogeneity. We then refined each class (CryoSparc v3.3.1 Local  
006 Refinement due to symmetry expansion) and assessed the resulting structures, selecting the  
007 mode of variability that contained our features of interest. From the resting-like and  
008 preactivated-like stacks with weak TMD density, we obtained the ~C2 and ~C4 TMD transition  
009 states presented in Figure 4D-E and S15. From the resting-like and preactivated-like stacks  
010 with weak CD density, we obtained the asymmetric ARM2 sampling states presented in Figure  
011 3A. For the ARM2 retraction analysis in Figure 3B-G and wedge loop analysis in Figure S12K-  
012 P, we increased the requested number of clusters to 10 and 20 respectively and selected 6  
013 refinements that appeared to be on a shared trajectory for both ARM2 retraction and loop  
014 melting for presentation.

015 For resolving the higher-order interactions between inhibited particles, the non-  
016 symmetry expanded stack of 1045k particles was subjected to CryoSparc v3.3.1  
017 Heterogeneous Refinement seeded with 24 identical references of the inhibited state, which  
018 resulted in three classes (246k particles total) with strong density for interactions with an  
019 adjacent tetramer. This classification was used to quantify the particle distributions for

020 clustered versus isolated inhibited states. The clustered particles were subjected to C4  
021 symmetry expansion and local refinement using the entire CD mask, which showed that the  
022 interaction was likely formed between ARM2 of the central protomer and CLD of the adjacent  
023 protomer. Creating a new soft mask of these two interacting domains, we performed local  
024 refinement, 3DVA, and clustering along the tertiary mode of variability into 5 groups to resolve  
025 the ordered interaction at 3.4 Å from 79k particles. We then applied density modification and  
026 built a model of the interaction from two tetramers spanning residues 790-1696 from the  
027 central tetramer and residues 644-1695 from the adjacent tetramer.

028 For the depictions of the composite maps in Figure 1, four copies of the single-chain  
029 composite were fit to the consensus C4 refinement and combined using the Chimera VOPMAX  
030 command <sup>107</sup>. For the depictions of ARM2 density in Figure 3, unsharpened local CD  
031 refinements were shown. For depictions of the overall density or slices at the JD ring, gate,  
032 and S1'-S1'' in Figure 4 and Figure S15, the unsharpened consensus refinement maps were  
033 low-pass filtered to 4 Å (overall) or 7 Å (zoomed) using `relion_image_handler` <sup>109,110</sup>. For the  
034 depictions of the wedge loop density in Figure S13B, the resting state composite map was  
035 used. For the depictions of the wedge loop density in Figure S13K-P, a B-factor derived from  
036 the Guinier plot was used to sharpen the CD local refinements for presentation. All figures  
037 depicting models were generated in PyMol (Schrodinger, LLC. 2010. The PyMOL Molecular  
038 Graphics System, Version 2.5.3), and all figures depicting density alone were generated in  
039 ChimeraX <sup>111,112</sup>. For the electrostatics calculations in Figure S14C-D and S17A, the Adaptive  
040 Poisson-Boltzmann Solver (APBS) algorithm <sup>113</sup> was utilized via PyMol plug-in.

041

#### 042 **High performance computing:**

043 The MSK HPC resource provides a GPU cluster built for computing large volume data  
044 over a range of applications from drug discovery to deep learning and image processing. It  
045 contains 120 nodes connected by a 100 Gigabit ethernet backbone. The nodes used for this  
046 project each contain Intel Xeon Platinum 2.2 GHz CPUs and 1 TB DDR4 RAM. Each node  
047 also contains four A100 GPUs interconnected using NVLink. The cluster runs the CentOS  
048 operating system and is supported by a 4 PB high-speed GPFS-based parallel filesystem. A  
049 200 TB NVMe-based Weka ultra-fast tier was used as scratch space. The CPU to GPU  
050 communication is established over PCIE 4.0. The project used IBM Spectrum LSF as the

051 orchestrator of shared resources and parallelization is further achieved by MPI over the  
052 ethernet network. All cryo-EM software excluding CryoSparc was maintained via HMS SBGrid  
053 <sup>114</sup>. Multiple sequence alignments were performed using the MUSCLE <sup>115</sup> algorithm in  
054 DNASTAR LaserGene MegAlign Pro 17.3.

055

056 **Adherent cell culture:**

057 HEK293T-IP<sub>3</sub>R-null cells were obtained through Kerafast <sup>51</sup> and cultured to a confluency  
058 of ~75-80% on 100 X 20 mm tissue culture treated dishes in DMEM supplemented with 10%  
059 fetal bovine serum, 100 U/ml penicillin, 100 mg/ml streptomycin at 37°C with 5% CO<sub>2</sub>. For  
060 imaging, cells were then split in a 1:4 ratio and plated on poly-D-lysine coated, 35mm  
061 diameter, optical quality glass-bottom culture dishes (World Precision Instruments; #  
062 FD35PDL-100) and incubated for ~18-24 hours. At ~60% confluency, cells were transduced  
063 with a 200 µl baculovirus followed by incubation at 37 C, 5% CO<sub>2</sub> for another 24 hours. All  
064 constructs used for Ca<sup>2+</sup> imaging in this study were overexpressed in HEK293T-IP3R-null cells  
065 using the BacMam system <sup>116</sup>.

066

067 **Ca<sup>2+</sup> imaging and data processing:**

068 24 hours after baculovirus transduction, cells were gently washed with imaging buffer  
069 [20 mM HEPES supplemented Ca<sup>2+</sup>, Mg<sup>2+</sup> free, Hank's balanced salt solution (ThermoFisher;  
070 #14175103)] followed by incubation for 1 hour at 37°C and 5% CO<sub>2</sub> in 1800 µl of imaging  
071 buffer containing 3 mM Cal-520-AM (AAT Bioquest; #21130) Cal-520-AM-loaded cells were  
072 removed from the CO<sub>2</sub> incubator and equilibrated at room temperature for 5 minutes prior to  
073 IP<sub>3</sub> stimulation by the addition of 200 µl of 1 mM carbachol (Alfa Aesar; #L06674-06), a Gαq-  
074 coupled M3 muscarinic receptor agonist. Carbachol was added at least 10 mm away from the  
075 imaging site and allowed to diffuse to a final concentration of 100 µM. Movies of carbachol-  
076 induced Ca<sup>2+</sup> release in cells were collected at 20x with LD Plan-Neofluar 20X/0.4 Korr M27  
077 objective, for 10 minutes, at 3x3 binning (912x736 pixels post binning), with an exposure time  
078 of 250ms on a Zeiss Axio observer D1 inverted phase-contrast fluorescence microscope  
079 equipped with an Axiocam 506 Mono camera (Zeiss). Cal-520-AM imaging was carried out by  
080 exciting the sample at 493 nm and monitoring emission at 515 nm using X-Cite Series 120Q  
081 illumination system and Zeiss filter set 38 HE.

082 Ca<sup>2+</sup> imaging movies were processed using ImageJ <sup>117</sup>, Fiji <sup>118</sup> and MathWorks MATLAB  
083 9.12.0.1884302 (R2022a) to extract Cal-520-AM fluorescence traces from individual cells.  
084 Movie stacks were background-subtracted with a 200-pixel rolling ball radius in ImageJ.  
085 Maximum intensity projection of the stack was used to generate a difference of gaussian  
086 image, which was used for edge detection and cell segmentation using MATLAB's Image  
087 Processing Toolbox. Traces were then extracted from segmented cells, smoothed over 41  
088 frames using a Savitzky–Golay filter of polynomial order 2, normalized by Z-score, and  
089 baseline adjusted using the linear method of MATLAB's 1-D data interpolation function with a  
090 custom MATLAB script called Baseline Fit <sup>119</sup>. In the baseline-adjusted traces, the smallest  
091 observed Ca<sup>2+</sup> oscillation peak value was used to manually threshold and identify other peaks  
092 automatically. Detected peaks were then used to calculate inter-spike intervals using  
093 MATLAB's Signal Processing Toolbox. All statistical tests were performed using GraphPad  
094 Prism 9. Data reported are from 3 independent biological replicates.

095 For analysis of peaks from individual replicates, traces with transients/oscillations were  
096 baseline adjusted in MATLAB using Baseline Fit <sup>119</sup> and normalized between 0 and 1. The first  
097 peak of each oscillation/transient was identified and a window of 75 seconds on both sides of  
098 the peak was extracted and aligned at the peak position. Mean and 95% confidence intervals  
099 were calculated using GraphPad Prism and overlaid on traces from a single biological  
100 replicate. A 1 second window on both sides of the mean data point corresponding to half  
101 maximal intensity were fit to a straight line and used to calculate the mean rising phase for  
102 constructs exhibiting transients/oscillations. Traces with oscillations were sorted based on the  
103 maximum number of distinguishable peaks and plotted as a fraction of total oscillatory traces.

104

105 **Fura-2 calibration:**

106 10  $\mu$ l of the 5X ligand and  $\text{Ca}^{2+}$  chelator cocktail (described earlier) of 100 – 4 nM free  $\text{Ca}^{2+}$   
107 concentration was added to 40  $\mu$ l of 62.5  $\mu$ M Fura2 (ThermoFisher; #F-1200) diluted in gel  
108 filtration buffer [150 mM NaCl, 50 mM Tris-HCl pH 8.0, 0.02% LMNG, and 2 mM dithiothreitol  
109 (DTT)] to bring Fura-2 to a final concentration of 50 mM. Samples were excited at 340 nm and  
110 380 nm, and fluorescence emissions were collected at 510 nm in a 96 well black/clear bottom  
111 plate using Molecular Devices SpectraMax M5e microplate reader at room temperature.  
112 Fluorescence emission ratios at 340/380 excitation were then calculated and fitted to a sigmoid  
113 using a logistic dose-response function in GraphPad Prism 9.

114

115

116

117 **References:**

118

- 119 1. Lagos-Cabré, R., Ivanova, A., and Taylor, C.W. (2020). Ca<sup>2+</sup> Release by IP3 Receptors Is Required  
120 to Orient the Mitotic Spindle. *Cell Rep.* 33, 108483. [10.1016/j.celrep.2020.108483](https://doi.org/10.1016/j.celrep.2020.108483).
- 121 2. Mikoshiba, K. (2011). Role of IP3 receptor in development. *Cell Calcium* 49, 331–340.  
122 [10.1016/j.ceca.2010.12.006](https://doi.org/10.1016/j.ceca.2010.12.006).
- 123 3. Ahumada-Castro, U., Bustos, G., Silva-Pavez, E., Puebla-Huerta, A., Lovy, A., and Cárdenas, C.  
124 (2021). In the Right Place at the Right Time: Regulation of Cell Metabolism by IP3R-Mediated  
125 Inter-Organelle Ca<sup>2+</sup> Fluxes. *Front. Cell Dev. Biol.* 9.
- 126 4. Wei, C., Wang, X., Zheng, M., and Cheng, H. (2012). Calcium gradients underlying cell migration.  
127 *Curr. Opin. Cell Biol.* 24, 254–261. [10.1016/j.ceb.2011.12.002](https://doi.org/10.1016/j.ceb.2011.12.002).
- 128 5. Tsai, F.-C., Kuo, G.-H., Chang, S.-W., and Tsai, P.-J. (2015). Ca<sup>2+</sup> Signaling in Cytoskeletal  
129 Reorganization, Cell Migration, and Cancer Metastasis. *BioMed Res. Int.* 2015, e409245.  
130 [10.1155/2015/409245](https://doi.org/10.1155/2015/409245).
- 131 6. Joseph, S.K., and Hajnóczky, G. (2007). IP3 receptors in cell survival and apoptosis: Ca<sup>2+</sup> release  
132 and beyond. *Apoptosis* 12, 951–968. [10.1007/s10495-007-0719-7](https://doi.org/10.1007/s10495-007-0719-7).
- 133 7. Kania, E., Roest, G., Vervliet, T., Parys, J.B., and Bultynck, G. (2017). IP3 Receptor-Mediated  
134 Calcium Signaling and Its Role in Autophagy in Cancer. *Front. Oncol.* 7.
- 135 8. Moy, R.H., Nguyen, A., Loo, J.M., Yamaguchi, N., Kajba, C.M., Santhanam, B., Ostendorf, B.N., Wu,  
136 Y.G., Tavazoie, S., and Tavazoie, S.F. (2022). Functional genetic screen identifies  
137 ITPR3/calcium/RELB axis as a driver of colorectal cancer metastatic liver colonization. *Dev. Cell* 57,  
138 1146-1159.e7. [10.1016/j.devcel.2022.04.010](https://doi.org/10.1016/j.devcel.2022.04.010).
- 139 9. Shibao, K., Fiedler, M.J., Nagata, J., Minagawa, N., Hirata, K., Nakayama, Y., Iwakiri, Y., Nathanson,  
140 M.H., and Yamaguchi, K. (2010). The type III inositol 1,4,5-trisphosphate receptor is associated  
141 with aggressiveness of colorectal carcinoma. *Cell Calcium* 48, 315–323.  
142 [10.1016/j.ceca.2010.09.005](https://doi.org/10.1016/j.ceca.2010.09.005).
- 143 10. Egorova, P.A., and Bezprozvanny, I.B. (2018). Inositol 1,4,5-trisphosphate receptors and  
144 neurodegenerative disorders. *FEBS J.* 285, 3547–3565. [10.1111/febs.14366](https://doi.org/10.1111/febs.14366).
- 145 11. Foskett, J.K. (2010). Inositol trisphosphate receptor Ca<sup>2+</sup> release channels in neurological  
146 diseases. *Pflüg. Arch. - Eur. J. Physiol.* 460, 481–494. [10.1007/s00424-010-0826-0](https://doi.org/10.1007/s00424-010-0826-0).
- 147 12. Garcia, M.I., and Boehning, D. (2017). Cardiac inositol 1,4,5-trisphosphate receptors. *Biochim.*  
148 *Biophys. Acta BBA - Mol. Cell Res.* 1864, 907–914. [10.1016/j.bbamcr.2016.11.017](https://doi.org/10.1016/j.bbamcr.2016.11.017).

- 149 13. Akimzhanov, A.M., and Boehning, D. (2012). IP3R function in cells of the immune system. Wiley  
150 Interdiscip. Rev. Membr. Transp. Signal. *1*, 329–339. 10.1002/wmts.27.
- 151 14. Iino, M. (1990). Biphasic Ca<sup>2+</sup> dependence of inositol 1,4,5-trisphosphate-induced Ca release in  
152 smooth muscle cells of the guinea pig taenia caeci. *J. Gen. Physiol.* *95*, 1103–1122.  
153 10.1085/jgp.95.6.1103.
- 154 15. Bezprozvanny, L., Watras, J., and Ehrlich, B.E. (1991). Bell-shaped calcium-response curves of  
155 Ins(1,4,5)P<sub>3</sub>- and calcium-gated channels from endoplasmic reticulum of cerebellum. *Nature* *351*,  
156 751–754. 10.1038/351751a0.
- 157 16. Boehning, D., Mak, D.-O.D., Foskett, J.K., and Joseph, S.K. (2001). Molecular Determinants of Ion  
158 Permeation and Selectivity in Inositol 1,4,5-Trisphosphate Receptor Ca<sup>2+</sup> Channels \*. *J. Biol.*  
159 *Chem.* *276*, 13509–13512. 10.1074/jbc.C100094200.
- 160 17. Mak, D.-O.D., McBride, S., and Foskett, J.K. (1998). Inositol 1,4,5-tris-phosphate activation of  
161 inositol tris-phosphate receptor Ca<sup>2+</sup> channel by ligand tuning of Ca<sup>2+</sup> inhibition. *Proc. Natl.*  
162 *Acad. Sci.* *95*, 15821–15825. 10.1073/pnas.95.26.15821.
- 163 18. Gin, E., Falcke, M., Wagner, L.E., Yule, D.I., and Sneyd, J. (2009). A Kinetic Model of the Inositol  
164 Trisphosphate Receptor Based on Single-Channel Data. *Biophys. J.* *96*, 4053–4062.  
165 10.1016/j.bpj.2008.12.3964.
- 166 19. Foskett, J.K., White, C., Cheung, K.-H., and Mak, D.-O.D. (2007). Inositol Trisphosphate Receptor  
167 Ca<sup>2+</sup> Release Channels. *Physiol. Rev.* *87*, 593–658. 10.1152/physrev.00035.2006.
- 168 20. Nakamura, Y., and Fukami, K. (2017). Regulation and physiological functions of mammalian  
169 phospholipase C. *J. Biochem. (Tokyo)*, mvw094. 10.1093/jb/mvw094.
- 170 21. Betzenhauser, M.J., and Yule, D.I. (2010). Chapter 12 - Regulation of Inositol 1,4,5-Trisphosphate  
171 Receptors by Phosphorylation and Adenine Nucleotides. In *Current Topics in Membranes*  
172 *Structure and Function of Calcium Release Channels.*, I. I. Serysheva, ed. (Academic Press), pp.  
173 273–298. 10.1016/S1063-5823(10)66012-7.
- 174 22. Vais, H., Wang, M., Mallilankaraman, K., Payne, R., McKennan, C., Lock, J.T., Spruce, L.A., Fiest, C.,  
175 Chan, M.Y.-L., Parker, I., et al. (2020). ER-luminal [Ca<sup>2+</sup>] regulation of InsP<sub>3</sub> receptor gating  
176 mediated by an ER-luminal peripheral Ca<sup>2+</sup>-binding protein. *eLife* *9*, e53531.  
177 10.7554/eLife.53531.
- 178 23. Patterson, R.L., Boehning, D., and Snyder, S.H. (2004). Inositol 1,4,5-Trisphosphate Receptors as  
179 Signal Integrators. *Annu. Rev. Biochem.* *73*, 437–465.  
180 10.1146/annurev.biochem.73.071403.161303.
- 181 24. Hajnóczky, G., Robb-Gaspers, L.D., Seitz, M.B., and Thomas, A.P. (1995). Decoding of cytosolic  
182 calcium oscillations in the mitochondria. *Cell* *82*, 415–424. 10.1016/0092-8674(95)90430-1.

- 183 25. Li, W., Llopis, J., Whitney, M., Zlokarnik, G., and Tsien, R.Y. (1998). Cell-permeant caged InsP3  
184 ester shows that Ca<sup>2+</sup> spike frequency can optimize gene expression. *Nature* 392, 936–941.  
185 10.1038/31965.
- 186 26. Dolmetsch, R.E., Xu, K., and Lewis, R.S. (1998). Calcium oscillations increase the efficiency and  
187 specificity of gene expression. *Nature* 392, 933–936. 10.1038/31960.
- 188 27. Gu, X., and Spitzer, N.C. (1995). Distinct aspects of neuronal differentiation encoded by frequency  
189 of spontaneous Ca<sup>2+</sup> transients. *Nature* 375, 784–787. 10.1038/375784a0.
- 190 28. Fan, G., Baker, M.L., Wang, Z., Baker, M.R., Sinyagovskiy, P.A., Chiu, W., Ludtke, S.J., and  
191 Serysheva, I.I. (2015). Gating machinery of InsP3R channels revealed by electron cryomicroscopy.  
192 *Nature* 527, 336–341. 10.1038/nature15249.
- 193 29. Paknejad, N., and Hite, R.K. (2018). Structural basis for the regulation of inositol trisphosphate  
194 receptors by Ca<sup>2+</sup> and IP<sub>3</sub>. *Nat. Struct. Mol. Biol.* 25, 660–668. 10.1038/s41594-018-0089-6.
- 195 30. Fan, G., Baker, M.R., Wang, Z., Seryshev, A.B., Ludtke, S.J., Baker, M.L., and Serysheva, I.I. (2018).  
196 Cryo-EM reveals ligand induced allostery underlying InsP3R channel gating. *Cell Res.* 28, 1158–  
197 1170. 10.1038/s41422-018-0108-5.
- 198 31. Azumaya, C.M., Linton, E.A., Risener, C.J., Nakagawa, T., and Karakas, E. (2020). Cryo-EM structure  
199 of human type-3 inositol triphosphate receptor reveals the presence of a self-binding peptide that  
200 acts as an antagonist. *J. Biol. Chem.* 295, 1743–1753. 10.1074/jbc.RA119.011570.
- 201 32. Baker, M.R., Fan, G., Seryshev, A.B., Agosto, M.A., Baker, M.L., and Serysheva, I.I. (2021). Cryo-EM  
202 structure of type 1 IP<sub>3</sub>R channel in a lipid bilayer. *Commun. Biol.* 4, 1–11. 10.1038/s42003-021-  
203 02156-4.
- 204 33. Schmitz, E.A., Takahashi, H., and Karakas, E. (2022). Structural basis for activation and gating of  
205 IP<sub>3</sub> receptors. *Nat. Commun.* 13, 1408. 10.1038/s41467-022-29073-2.
- 206 34. Fan, G., Baker, M.R., Terry, L.E., Arige, V., Chen, M., Seryshev, A.B., Baker, M.L., Ludtke, S.J., Yule,  
207 D.I., and Serysheva, I.I. (2022). Conformational motions and ligand-binding underlying gating and  
208 regulation in IP<sub>3</sub>R channel. *Nat. Commun.* 13, 6942. 10.1038/s41467-022-34574-1.
- 209 35. Woll, K.A., and Van Petegem, F. (2022). Calcium-release channels: structure and function of IP<sub>3</sub>  
210 receptors and ryanodine receptors. *Physiol. Rev.* 102, 209–268. 10.1152/physrev.00033.2020.
- 211 36. Punjani, A., and Fleet, D.J. (2021). 3D variability analysis: Resolving continuous flexibility and  
212 discrete heterogeneity from single particle cryo-EM. *J. Struct. Biol.* 213, 107702.  
213 10.1016/j.jsb.2021.107702.
- 214 37. Kaftan, E.J., Ehrlich, B.E., and Watras, J. (1997). Inositol 1,4,5-Trisphosphate (InsP<sub>3</sub>) and Calcium  
215 Interact to Increase the Dynamic Range of InsP<sub>3</sub> Receptor-dependent Calcium Signaling. *J. Gen.  
216 Physiol.* 110, 529–538. 10.1085/jgp.110.5.529.



- 217 38. Yoshikawa, F., Morita, M., Monkawa, T., Michikawa, T., Furuichi, T., and Mikoshiba, K. (1996).  
218 Mutational Analysis of the Ligand Binding Site of the Inositol 1,4,5-Trisphosphate Receptor \*. J.  
219 Biol. Chem. 271, 18277–18284. 10.1074/jbc.271.30.18277.
- 220 39. Bosanac, I., Alattia, J.-R., Mal, T.K., Chan, J., Talarico, S., Tong, F.K., Tong, K.I., Yoshikawa, F.,  
221 Furuichi, T., Iwai, M., et al. (2002). Structure of the inositol 1,4,5-trisphosphate receptor binding  
222 core in complex with its ligand. Nature 420, 696–700. 10.1038/nature01268.
- 223 40. Lin, C.-C., Baek, K., and Lu, Z. (2011). Apo and InsP3-bound crystal structures of the ligand-binding  
224 domain of an InsP3 receptor. Nat. Struct. Mol. Biol. 18, 1172–1174. 10.1038/nsmb.2112.
- 225 41. Seo, M.-D., Velamakanni, S., Ishiyama, N., Stathopoulos, P.B., Rossi, A.M., Khan, S.A., Dale, P., Li, C.,  
226 Ames, J.B., Ikura, M., et al. (2012). Structural and functional conservation of key domains in InsP3  
227 and ryanodine receptors. Nature 483, 108–112. 10.1038/nature10751.
- 228 42. des Georges, A., Clarke, O.B., Zalk, R., Yuan, Q., Condon, K.J., Grassucci, R.A., Hendrickson, W.A.,  
229 Marks, A.R., and Frank, J. (2016). Structural Basis for Gating and Activation of RyR1. Cell 167, 145-  
230 157.e17. 10.1016/j.cell.2016.08.075.
- 231 43. Ferris, C.D., Haganir, R.L., and Snyder, S.H. (1990). Calcium flux mediated by purified inositol 1,4,5-  
232 trisphosphate receptor in reconstituted lipid vesicles is allosterically regulated by adenine  
233 nucleotides. Proc. Natl. Acad. Sci. 87, 2147–2151. 10.1073/pnas.87.6.2147.
- 234 44. Iino, M. (1991). Effects of adenine nucleotides on inositol 1,4,5-trisphosphate-induced calcium  
235 release in vascular smooth muscle cells. J. Gen. Physiol. 98, 681–698. 10.1085/jgp.98.4.681.
- 236 45. Maeda, N., Kawasaki, T., Nakade, S., Yokota, N., Taguchi, T., Kasai, M., and Mikoshiba, K. (1991).  
237 Structural and functional characterization of inositol 1,4,5-trisphosphate receptor channel from  
238 mouse cerebellum. J. Biol. Chem. 266, 1109–1116. 10.1016/S0021-9258(17)35289-4.
- 239 46. Hite, R.K., and MacKinnon, R. (2017). Structural Titration of Slo2.2, a Na<sup>+</sup>-Dependent K<sup>+</sup> Channel.  
240 Cell 168, 390-399.e11. 10.1016/j.cell.2016.12.030.
- 241 47. Berridge, M.J. (1997). Elementary and global aspects of calcium signalling. J. Exp. Biol. 200, 315–  
242 319. 10.1242/jeb.200.2.315.
- 243 48. De Young, G.W., and Keizer, J. (1992). A single-pool inositol 1,4,5-trisphosphate-receptor-based  
244 model for agonist-stimulated oscillations in Ca<sup>2+</sup> concentration. Proc. Natl. Acad. Sci. 89, 9895–  
245 9899. 10.1073/pnas.89.20.9895.
- 246 49. Marchant, J.S., and Parker, I. (2001). Role of elementary Ca<sup>2+</sup> puffs in generating repetitive Ca<sup>2+</sup>  
247 oscillations. EMBO J. 20, 65–76. 10.1093/emboj/20.1.65.
- 248 50. Hajnóczky, G., and Thomas, A.P. (1997). Minimal requirements for calcium oscillations driven by  
249 the IP3 receptor. EMBO J. 16, 3533–3543. 10.1093/emboj/16.12.3533.

- 250 51. Alzayady, K.J., Wang, L., Chandrasekhar, R., Wagner, L.E., Van Petegem, F., and Yule, D.I. (2016).  
251 Defining the stoichiometry of inositol 1,4,5-trisphosphate binding required to initiate Ca<sup>2+</sup>  
252 release. *Sci. Signal.* *9*, ra35–ra35. [10.1126/scisignal.aad6281](https://doi.org/10.1126/scisignal.aad6281).
- 253 52. Rooney, T.A., Sass, E.J., and Thomas, A.P. (1989). Characterization of Cytosolic Calcium Oscillations  
254 Induced by Phenylephrine and Vasopressin in Single Fura-2-loaded Hepatocytes. *J. Biol. Chem.*  
255 *264*, 17131–17141. [10.1016/S0021-9258\(18\)71469-5](https://doi.org/10.1016/S0021-9258(18)71469-5).
- 256 53. Meyer, T., and Stryer, L. (1991). Calcium Spiking. *Annu. Rev. Biophys. Biophys. Chem.* *20*, 153–174.  
257 [10.1146/annurev.bb.20.060191.001101](https://doi.org/10.1146/annurev.bb.20.060191.001101).
- 258 54. Thurley, K., Tovey, S.C., Moenke, G., Prince, V.L., Meena, A., Thomas, A.P., Skupin, A., Taylor, C.W.,  
259 and Falcke, M. (2014). Reliable Encoding of Stimulus Intensities Within Random Sequences of  
260 Intracellular Ca<sup>2+</sup> Spikes. *Sci. Signal.* *7*, ra59–ra59. [10.1126/scisignal.2005237](https://doi.org/10.1126/scisignal.2005237).
- 261 55. Arige, V., Terry, L., Wagner, L., Baker, M., Fan, G., Serysheva, I., and Yule, D. (2022). Functional  
262 Determination of Calcium Binding Sites Required for the Activation of Inositol 1,4,5-trisphosphate  
263 receptor. [10.1101/2022.03.07.482538](https://doi.org/10.1101/2022.03.07.482538).
- 264 56. Pietri, F., Hilly, M., and Mauger, J.P. (1990). Calcium mediates the interconversion between two  
265 states of the liver inositol 1,4,5-trisphosphate receptor. *J. Biol. Chem.* *265*, 17478–17485.  
266 [10.1016/S0021-9258\(18\)38189-4](https://doi.org/10.1016/S0021-9258(18)38189-4).
- 267 57. Marshall, I.C., and Taylor, C.W. (1994). Two calcium-binding sites mediate the interconversion of  
268 liver inositol 1,4,5-trisphosphate receptors between three conformational states. *Biochem. J.* *301*  
269 (*Pt 2*), 591–598. [10.1042/bj3010591](https://doi.org/10.1042/bj3010591).
- 270 58. Marchant, J.S., and Taylor, C.W. (1997). Cooperative activation of IP<sub>3</sub> receptors by sequential  
271 binding of IP<sub>3</sub> and Ca<sup>2+</sup> safeguards against spontaneous activity. *Curr. Biol.* *7*, 510–518.  
272 [10.1016/S0960-9822\(06\)00222-3](https://doi.org/10.1016/S0960-9822(06)00222-3).
- 273 59. Soulsby, M.D., and Wojcikiewicz, R.J.H. (2005). The type III inositol 1,4,5-trisphosphate receptor is  
274 phosphorylated by cAMP-dependent protein kinase at three sites. *Biochem. J.* *392*, 493–497.  
275 [10.1042/BJ20051325](https://doi.org/10.1042/BJ20051325).
- 276 60. Soulsby, M.D., and Wojcikiewicz, R.J.H. (2007). Calcium mobilization via type III inositol 1,4,5-  
277 trisphosphate receptors is not altered by PKA-mediated phosphorylation of serines 916, 934, and  
278 1832. *Cell Calcium* *42*, 261–270. [10.1016/j.ceca.2006.12.002](https://doi.org/10.1016/j.ceca.2006.12.002).
- 279 61. Wang, D., Liu, D., Yuchi, J., He, F., Jiang, Y., Cai, S., Li, J., and Xu, D. (2020). MusiteDeep: a deep-  
280 learning based webserver for protein post-translational modification site prediction and  
281 visualization. *Nucleic Acids Res.* *48*, W140–W146. [10.1093/nar/gkaa275](https://doi.org/10.1093/nar/gkaa275).
- 282 62. Betzenhauser, M.J., Fike, J.L., li, L.E.W., and Yule, D.I. (2009). Protein Kinase A Increases Type-2  
283 Inositol 1,4,5-Trisphosphate Receptor Activity by Phosphorylation of Serine 937 \*. *J. Biol. Chem.*  
284 *284*, 25116–25125. [10.1074/jbc.M109.010132](https://doi.org/10.1074/jbc.M109.010132).

- 285 63. Marchant, J., Callamaras, N., and Parker, I. (1999). Initiation of IP<sub>3</sub>-mediated Ca<sup>2+</sup> waves in  
286 Xenopus oocytes. *EMBO J.* *18*, 5285–5299. [10.1093/emboj/18.19.5285](https://doi.org/10.1093/emboj/18.19.5285).
- 287 64. Peng, W., Shen, H., Wu, J., Guo, W., Pan, X., Wang, R., Chen, S.R.W., and Yan, N. (2016). Structural  
288 basis for the gating mechanism of the type 2 ryanodine receptor RyR2. *Science* *354*, aah5324.  
289 [10.1126/science.aah5324](https://doi.org/10.1126/science.aah5324).
- 290 65. Miller, A.N., Vaisey, G., and Long, S.B. (2019). Molecular mechanisms of gating in the calcium-  
291 activated chloride channel bestrophin. *eLife* *8*, e43231. [10.7554/eLife.43231](https://doi.org/10.7554/eLife.43231).
- 292 66. Long, S.B., Campbell, E.B., and MacKinnon, R. (2005). Crystal Structure of a Mammalian Voltage-  
293 Dependent Shaker Family K<sup>+</sup> Channel. *Science* *309*, 897–903. [10.1126/science.1116269](https://doi.org/10.1126/science.1116269).
- 294 67. Yan, Z., Bai, X., Yan, C., Wu, J., Li, Z., Xie, T., Peng, W., Yin, C., Li, X., Scheres, S.H.W., et al. (2015).  
295 Structure of the rabbit ryanodine receptor RyR1 at near-atomic resolution. *Nature* *517*, 50–55.  
296 [10.1038/nature14063](https://doi.org/10.1038/nature14063).
- 297 68. Uchida, K., Miyauchi, H., Furuichi, T., Michikawa, T., and Mikoshiba, K. (2003). Critical Regions for  
298 Activation Gating of the Inositol 1,4,5-Trisphosphate Receptor \*. *J. Biol. Chem.* *278*, 16551–16560.  
299 [10.1074/jbc.M300646200](https://doi.org/10.1074/jbc.M300646200).
- 300 69. Hite, R.K., Tao, X., and MacKinnon, R. (2017). Structural basis for gating the high-conductance  
301 Ca<sup>2+</sup>-activated K<sup>+</sup> channel. *Nature* *541*, 52–57. [10.1038/nature20775](https://doi.org/10.1038/nature20775).
- 302 70. Mak, D.-O.D., McBride, S.M.J., and Foskett, J.K. (2003). Spontaneous channel activity of the  
303 inositol 1,4,5-trisphosphate (InsP<sub>3</sub>) receptor (InsP<sub>3</sub>R). Application of allosteric modeling to  
304 calcium and InsP<sub>3</sub> regulation of InsP<sub>3</sub>R single-channel gating. *J. Gen. Physiol.* *122*, 583–603.  
305 [10.1085/jgp.200308809](https://doi.org/10.1085/jgp.200308809).
- 306 71. Yamazaki, H., Chan, J., Ikura, M., Michikawa, T., and Mikoshiba, K. (2010). Tyr-167/Trp-168 in Type  
307 1/3 Inositol 1,4,5-Trisphosphate Receptor Mediates Functional Coupling between Ligand Binding  
308 and Channel Opening \*. *J. Biol. Chem.* *285*, 36081–36091. [10.1074/jbc.M110.140129](https://doi.org/10.1074/jbc.M110.140129).
- 309 72. Hu, J., Shibata, Y., Voss, C., Shemesh, T., Li, Z., Coughlin, M., Kozlov, M.M., Rapoport, T.A., and  
310 Prinz, W.A. (2008). Membrane Proteins of the Endoplasmic Reticulum Induce High-Curvature  
311 Tubules. *Science* *319*, 1247–1250. [10.1126/science.1153634](https://doi.org/10.1126/science.1153634).
- 312 73. West, M., Zurek, N., Hoenger, A., and Voeltz, G.K. (2011). A 3D analysis of yeast ER structure  
313 reveals how ER domains are organized by membrane curvature. *J. Cell Biol.* *193*, 333–346.  
314 [10.1083/jcb.201011039](https://doi.org/10.1083/jcb.201011039).
- 315 74. Dickinson, G.D., and Parker, I. (2013). Temperature Dependence of IP<sub>3</sub>-Mediated Local and Global  
316 Ca<sup>2+</sup> Signals. *Biophys. J.* *104*, 386–395. [10.1016/j.bpj.2012.12.024](https://doi.org/10.1016/j.bpj.2012.12.024).

- 317 75. Miledi, R., Parker, I., and Sumikawa, K. (1987). Oscillatory chloride current evoked by temperature  
318 jumps during muscarinic and serotonergic activation in *Xenopus* oocyte. *J. Physiol.* *383*, 213–229.  
319 [10.1113/jphysiol.1987.sp016405](https://doi.org/10.1113/jphysiol.1987.sp016405).
- 320 76. Schug, Z.T., and Joseph, S.K. (2006). The Role of the S4-S5 Linker and C-terminal Tail in Inositol  
321 1,4,5-Trisphosphate Receptor Function \*. *J. Biol. Chem.* *281*, 24431–24440.  
322 [10.1074/jbc.M604190200](https://doi.org/10.1074/jbc.M604190200).
- 323 77. Hamada, K., Miyatake, H., Terauchi, A., and Mikoshiba, K. (2017). IP3-mediated gating mechanism  
324 of the IP3 receptor revealed by mutagenesis and X-ray crystallography. *Proc. Natl. Acad. Sci.* *114*,  
325 4661–4666. [10.1073/pnas.1701420114](https://doi.org/10.1073/pnas.1701420114).
- 326 78. Jacob, R., Merritt, J.E., Hallam, T.J., and Rink, T.J. (1988). Repetitive spikes in cytoplasmic calcium  
327 evoked by histamine in human endothelial cells. *Nature* *335*, 40–45. [10.1038/335040a0](https://doi.org/10.1038/335040a0).
- 328 79. Mak, D.-O.D., McBride, S., and Foskett, J.K. (2001). Regulation by Ca<sup>2+</sup> and Inositol 1,4,5-  
329 Trisphosphate (Insp3) of Single Recombinant Type 3 Insp3 Receptor Channels: Ca<sup>2+</sup> Activation  
330 Uniquely Distinguishes Types 1 and 3 Insp3 Receptors. *J. Gen. Physiol.* *117*, 435–446.  
331 [10.1085/jgp.117.5.435](https://doi.org/10.1085/jgp.117.5.435).
- 332 80. Zubcevic, L., Herzik, M.A., Wu, M., Borschel, W.F., Hirschi, M., Song, A.S., Lander, G.C., and Lee, S.-  
333 Y. (2018). Conformational ensemble of the human TRPV3 ion channel. *Nat. Commun.* *9*, 4773.  
334 [10.1038/s41467-018-07117-w](https://doi.org/10.1038/s41467-018-07117-w).
- 335 81. Zubcevic, L., Le, S., Yang, H., and Lee, S.-Y. (2018). Conformational plasticity in the selectivity filter  
336 of the TRPV2 ion channel. *Nat. Struct. Mol. Biol.* *25*, 405–415. [10.1038/s41594-018-0059-z](https://doi.org/10.1038/s41594-018-0059-z).
- 337 82. Singh, A.K., McGoldrick, L.L., Demirkhanyan, L., Leslie, M., Zakharian, E., and Sobolevsky, A.I.  
338 (2019). Structural basis of temperature sensation by the TRP channel TRPV3. *Nat. Struct. Mol.*  
339 *Biol.* *26*, 994–998. [10.1038/s41594-019-0318-7](https://doi.org/10.1038/s41594-019-0318-7).
- 340 83. Niu, Y., Tao, X., Touhara, K.K., and MacKinnon, R. (2020). Cryo-EM analysis of PIP2 regulation in  
341 mammalian GIRK channels. *eLife* *9*, e60552. [10.7554/eLife.60552](https://doi.org/10.7554/eLife.60552).
- 342 84. Rahman, T. (2012). Dynamic clustering of IP3 receptors by IP3. *Biochem. Soc. Trans.* *40*, 325–330.  
343 [10.1042/BST20110772](https://doi.org/10.1042/BST20110772).
- 344 85. Smith, I.F., and Parker, I. (2009). Imaging the quantal substructure of single IP3R channel activity  
345 during Ca<sup>2+</sup> puffs in intact mammalian cells. *Proc. Natl. Acad. Sci.* *106*, 6404–6409.  
346 [10.1073/pnas.0810799106](https://doi.org/10.1073/pnas.0810799106).
- 347 86. Wiltgen, S.M., Dickinson, G.D., Swaminathan, D., and Parker, I. (2014). Termination of calcium  
348 puffs and coupled closings of inositol trisphosphate receptor channels. *Cell Calcium* *56*, 157–168.  
349 [10.1016/j.ceca.2014.06.005](https://doi.org/10.1016/j.ceca.2014.06.005).

- 350 87. Tateishi, Y., Hattori, M., Nakayama, T., Iwai, M., Bannai, H., Nakamura, T., Michikawa, T., Inoue, T.,  
351 and Mikoshiba, K. (2005). Cluster Formation of Inositol 1,4,5-Trisphosphate Receptor Requires Its  
352 Transition to Open State \*. *J. Biol. Chem.* *280*, 6816–6822. [10.1074/jbc.M405469200](https://doi.org/10.1074/jbc.M405469200).
- 353 88. Taufiq-Ur-Rahman, Skupin, A., Falcke, M., and Taylor, C.W. (2009). Clustering of InsP3 receptors  
354 by InsP3 retunes their regulation by InsP3 and Ca<sup>2+</sup>. *Nature* *458*, 655–659. [10.1038/nature07763](https://doi.org/10.1038/nature07763).
- 355 89. Rana, M.S., Wang, X., and Banerjee, A. (2018). An Improved Strategy for Fluorescent Tagging of  
356 Membrane Proteins for Overexpression and Purification in Mammalian Cells. *Biochemistry* *57*,  
357 6741–6751. [10.1021/acs.biochem.8b01070](https://doi.org/10.1021/acs.biochem.8b01070).
- 358 90. Walker, P.A., Leong, L.E.-C., Ng, P.W.P., Tan, S.H., Waller, S., Murphy, D., and Porter, A.G. (1994).  
359 Efficient and Rapid Affinity Purification of Proteins Using Recombinant Fusion Proteases.  
360 *Bio/Technology* *12*, 601–605. [10.1038/nbt0694-601](https://doi.org/10.1038/nbt0694-601).
- 361 91. Kirchhofer, A., Helma, J., Schmidhals, K., Frauer, C., Cui, S., Karcher, A., Pellis, M., Muyldermans,  
362 S., Casas-Delucchi, C.S., Cardoso, M.C., et al. (2010). Modulation of protein properties in living  
363 cells using nanobodies. *Nat. Struct. Mol. Biol.* *17*, 133–138. [10.1038/nsmb.1727](https://doi.org/10.1038/nsmb.1727).
- 364 92. Bers, D.M., Patton, C.W., and Nuccitelli, R. (2010). Chapter 1 - A Practical Guide to the Preparation  
365 of Ca<sup>2+</sup> Buffers. In *Methods in Cell Biology Calcium in Living Cells.*, M. Whitaker, ed. (Academic  
366 Press), pp. 1–26. [10.1016/B978-0-12-374841-6.00001-3](https://doi.org/10.1016/B978-0-12-374841-6.00001-3).
- 367 93. Mastronarde, D.N. (2005). Automated electron microscope tomography using robust prediction  
368 of specimen movements. *J. Struct. Biol.* *152*, 36–51. [10.1016/j.jsb.2005.07.007](https://doi.org/10.1016/j.jsb.2005.07.007).
- 369 94. Mastronarde, D.N. (2003). SerialEM: A Program for Automated Tilt Series Acquisition on Tecnai  
370 Microscopes Using Prediction of Specimen Position. *Microsc. Microanal.* *9*, 1182–1183.  
371 [10.1017/S1431927603445911](https://doi.org/10.1017/S1431927603445911).
- 372 95. Punjani, A., Rubinstein, J.L., Fleet, D.J., and Brubaker, M.A. (2017). cryoSPARC: algorithms for  
373 rapid unsupervised cryo-EM structure determination. *Nat. Methods* *14*, 290–296.  
374 [10.1038/nmeth.4169](https://doi.org/10.1038/nmeth.4169).
- 375 96. Zivanov, J., Nakane, T., and Scheres, S.H.W. (2019). A Bayesian approach to beam-induced motion  
376 correction in cryo-EM single-particle analysis. *IUCr* *6*, 5–17. [10.1107/S205225251801463X](https://doi.org/10.1107/S205225251801463X).
- 377 97. Punjani, A., Zhang, H., and Fleet, D.J. (2020). Non-uniform refinement: adaptive regularization  
378 improves single-particle cryo-EM reconstruction. *Nat. Methods* *17*, 1214–1221. [10.1038/s41592-  
379 020-00990-8](https://doi.org/10.1038/s41592-020-00990-8).
- 380 98. Zivanov, J., Nakane, T., Forsberg, B.O., Kimanius, D., Hagen, W.J., Lindahl, E., and Scheres, S.H.  
381 (2018). New tools for automated high-resolution cryo-EM structure determination in RELION-3.  
382 *eLife* *7*, e42166. [10.7554/eLife.42166](https://doi.org/10.7554/eLife.42166).

- 383 99. Zivanov, J., Nakane, T., and Scheres, S.H.W. (2020). Estimation of high-order aberrations and  
384 anisotropic magnification from cryo-EM data sets in RELION-3.1. *IUCr* 7, 253–267.  
385 10.1107/S2052252520000081.
- 386 100. Terwilliger, T.C., Ludtke, S.J., Read, R.J., Adams, P.D., and Afonine, P.V. (2020). Improvement of  
387 cryo-EM maps by density modification. *Nat. Methods* 17, 923–927. 10.1038/s41592-020-0914-9.
- 388 101. Alegre, K.O., Paknejad, N., Su, M., Lou, J.-S., Huang, J., Jordan, K.D., Eng, E.T., Meyerson, J.R., Hite,  
389 R.K., and Huang, X.-Y. (2021). Structural basis and mechanism of activation of two different  
390 families of G proteins by the same GPCR. *Nat. Struct. Mol. Biol.* 28, 936–944. 10.1038/s41594-  
391 021-00679-2.
- 392 102. Su, M., Paknejad, N., Zhu, L., Wang, J., Do, H.N., Miao, Y., Liu, W., Hite, R.K., and Huang, X.-Y.  
393 (2022). Structures of  $\beta$ 1-adrenergic receptor in complex with Gs and ligands of different efficacies.  
394 *Nat. Commun.* 13, 4095. 10.1038/s41467-022-31823-1.
- 395 103. Liu, S., Paknejad, N., Zhu, L., Kihara, Y., Ray, M., Chun, J., Liu, W., Hite, R.K., and Huang, X.-Y.  
396 (2022). Differential activation mechanisms of lipid GPCRs by lysophosphatidic acid and  
397 sphingosine 1-phosphate. *Nat. Commun.* 13, 731. 10.1038/s41467-022-28417-2.
- 398 104. Emsley, P., Lohkamp, B., Scott, W.G., and Cowtan, K. (2010). Features and development of Coot.  
399 *Acta Crystallogr. D Biol. Crystallogr.* 66, 486–501. 10.1107/S0907444910007493.
- 400 105. Croll, T.I. (2018). ISOLDE: a physically realistic environment for model building into low-resolution  
401 electron-density maps. *Acta Crystallogr. Sect. Struct. Biol.* 74, 519–530.  
402 10.1107/S2059798318002425.
- 403 106. Liebschner, D., Afonine, P.V., Baker, M.L., Bunkóczi, G., Chen, V.B., Croll, T.I., Hintze, B., Hung, L.-  
404 W., Jain, S., McCoy, A.J., et al. (2019). Macromolecular structure determination using X-rays,  
405 neutrons and electrons: recent developments in Phenix. *Acta Crystallogr. Sect. Struct. Biol.* 75,  
406 861–877. 10.1107/S2059798319011471.
- 407 107. Pettersen, E.F., Goddard, T.D., Huang, C.C., Couch, G.S., Greenblatt, D.M., Meng, E.C., and Ferrin,  
408 T.E. (2004). UCSF Chimera—a visualization system for exploratory research and analysis. *J.*  
409 *Comput. Chem.* 25, 1605–1612. 10.1002/jcc.20084.
- 410 108. Afonine, P.V., Poon, B.K., Read, R.J., Sobolev, O.V., Terwilliger, T.C., Urzhumtsev, A., and Adams,  
411 P.D. (2018). Real-space refinement in PHENIX for cryo-EM and crystallography. *Acta Crystallogr.*  
412 *Sect. Struct. Biol.* 74, 531–544. 10.1107/S2059798318006551.
- 413 109. Scheres, S.H.W. (2012). A Bayesian View on Cryo-EM Structure Determination. *J. Mol. Biol.* 415,  
414 406–418. 10.1016/j.jmb.2011.11.010.
- 415 110. Scheres, S.H.W. (2012). RELION: Implementation of a Bayesian approach to cryo-EM structure  
416 determination. *J. Struct. Biol.* 180, 519–530. 10.1016/j.jsb.2012.09.006.

- 417 111. Goddard, T.D., Huang, C.C., Meng, E.C., Pettersen, E.F., Couch, G.S., Morris, J.H., and Ferrin, T.E.  
418 (2018). UCSF ChimeraX: Meeting modern challenges in visualization and analysis. *Protein Sci.* 27,  
419 14–25. 10.1002/pro.3235.
- 420 112. Pettersen, E.F., Goddard, T.D., Huang, C.C., Meng, E.C., Couch, G.S., Croll, T.I., Morris, J.H., and  
421 Ferrin, T.E. (2021). UCSF ChimeraX: Structure visualization for researchers, educators, and  
422 developers. *Protein Sci.* 30, 70–82. 10.1002/pro.3943.
- 423 113. Jurrus, E., Engel, D., Star, K., Monson, K., Brandi, J., Felberg, L.E., Brookes, D.H., Wilson, L., Chen,  
424 J., Liles, K., et al. (2018). Improvements to the APBS biomolecular solvation software suite. *Protein*  
425 *Sci.* 27, 112–128. 10.1002/pro.3280.
- 426 114. Morin, A., Eisenbraun, B., Key, J., Sanschagrín, P.C., Timony, M.A., Ottaviano, M., and Sliz, P.  
427 (2013). Collaboration gets the most out of software. *eLife* 2, e01456. 10.7554/eLife.01456.
- 428 115. Edgar, R.C. (2004). MUSCLE: multiple sequence alignment with high accuracy and high  
429 throughput. *Nucleic Acids Res.* 32, 1792–1797. 10.1093/nar/gkh340.
- 430 116. Kost, T.A., Condreay, J.P., and Jarvis, D.L. (2005). Baculovirus as versatile vectors for protein  
431 expression in insect and mammalian cells. *Nat. Biotechnol.* 23, 567–575. 10.1038/nbt1095.
- 432 117. Abramoff, M.D., Magalhães, P.J., and Ram, S.J. (2004). Image processing with ImageJ.  
433 *Biophotonics Int.* 11, 36–42.
- 434 118. Schindelin, J., Arganda-Carreras, I., Frise, E., Kaynig, V., Longair, M., Pietzsch, T., Preibisch, S.,  
435 Rueden, C., Saalfeld, S., Schmid, B., et al. (2012). Fiji: an open-source platform for biological-image  
436 analysis. *Nat. Methods* 9, 676–682. 10.1038/nmeth.2019.
- 437 119. Hrovat, M. (2022). Baseline Fit. [https://www.mathworks.com/matlabcentral/fileexchange/24916-](https://www.mathworks.com/matlabcentral/fileexchange/24916-baseline-fit)  
438 [baseline-fit](https://www.mathworks.com/matlabcentral/fileexchange/24916-baseline-fit).
- 439  
440
